# Supplementary material for: Syntheses and cellular investigations of di-aspartate and aspartate-lysine chlorin e6 conjugates
Source: Royal Society of Chemistry journal article supplement (doi:10.1039/c5ob02241j), 2015-11-26
Supplement: c5ob02241j1.pdf [file c5ob02241j1.pdf]

## **Syntheses and Cellular Investigations of Di(aspartate) and Aspartate-lysine Chlorin e<sub>6</sub> Conjugates**

R. G. Waruna Jinadasa, Zehua Zhou, M. Graça H. Vicente and Kevin M. Smith\*

### **ELECTRONIC SUPPLEMENTARY INFORMATION**

|                                                     |           |
|-----------------------------------------------------|-----------|
| Copies of <sup>1</sup> H NMR spectra                | S2 – S14  |
| Copies of <sup>13</sup> C NMR spectra               | S15 – S18 |
| Dark and phototoxicity curves                       | S19-S20   |
| Subcellular localization for chlorin e <sub>6</sub> | S21       |

$^1\text{H}$  NMR spectrum of methyl pheophorbide *a* (**21**) in acetone- $d_6$  at 400 MHz

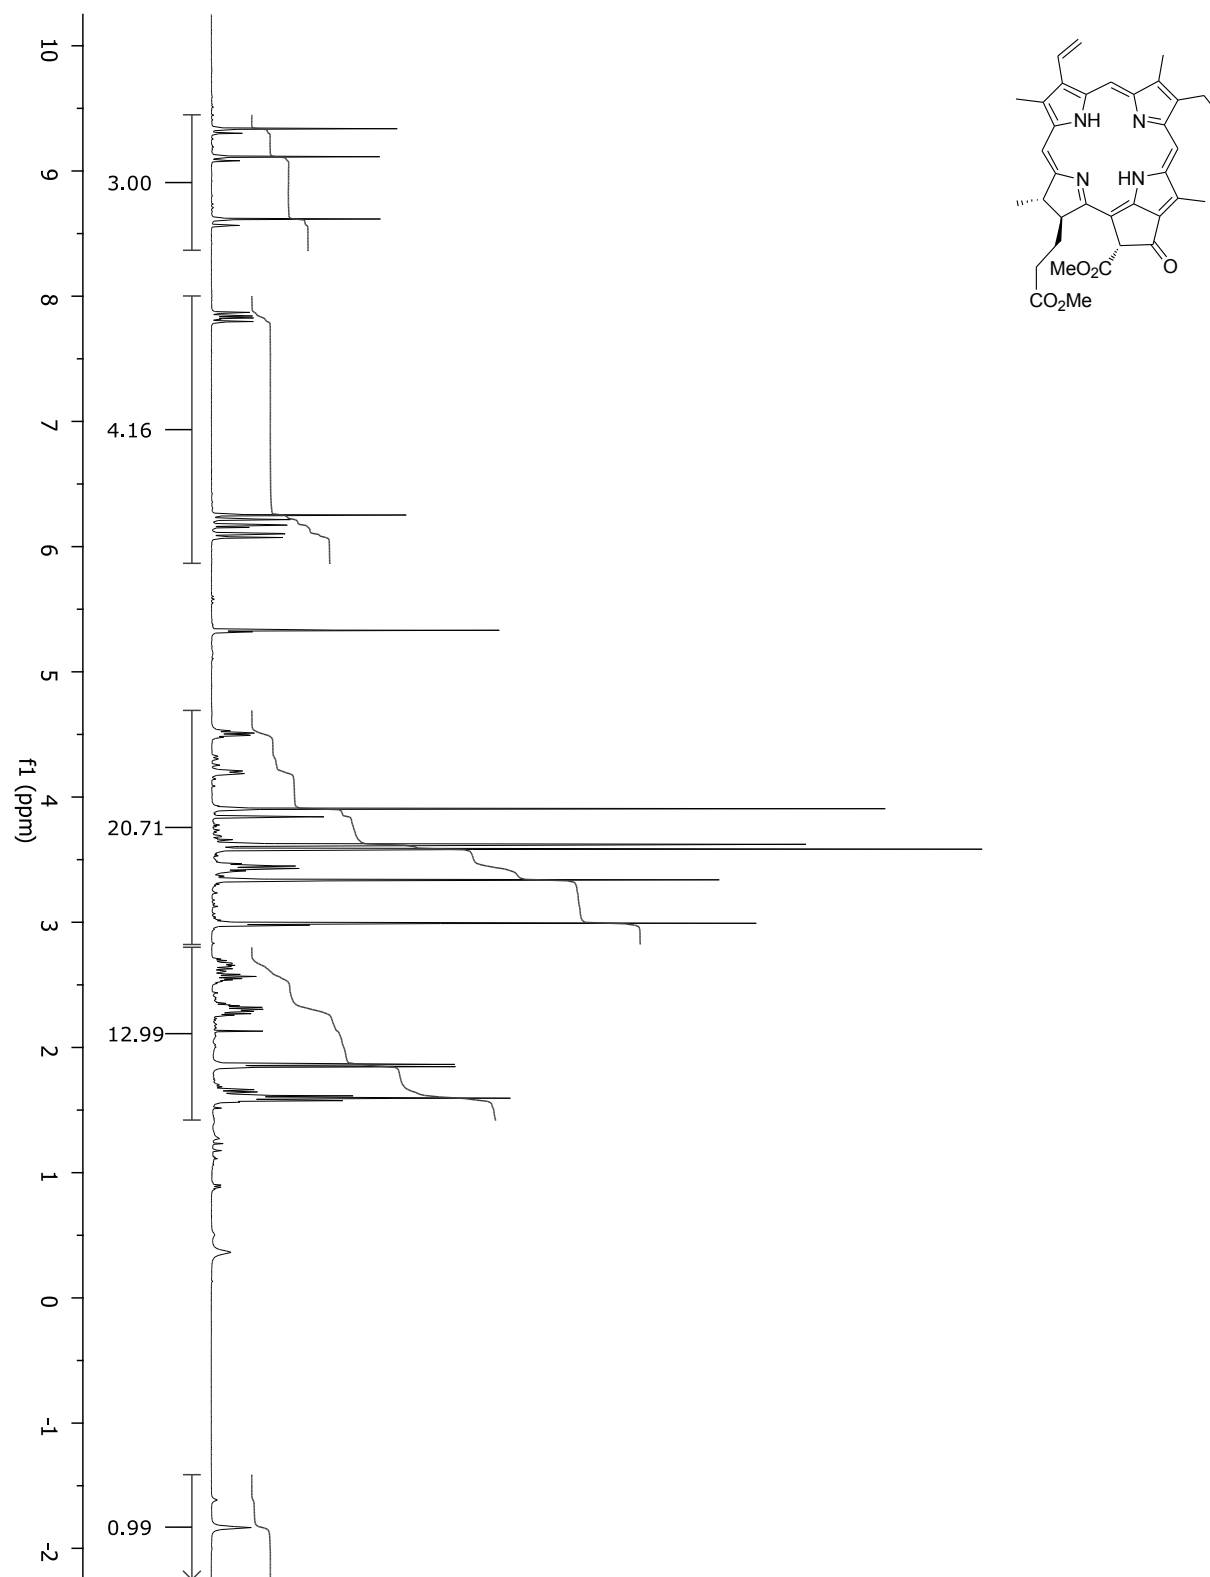

$^1\text{H}$  NMR spectrum of  $15^2,17^3$ -di(Asp) $\text{Ce}_6$  *tert*-butyl methyl ester (**11**) in acetone- $d_6$  at 400 MHz

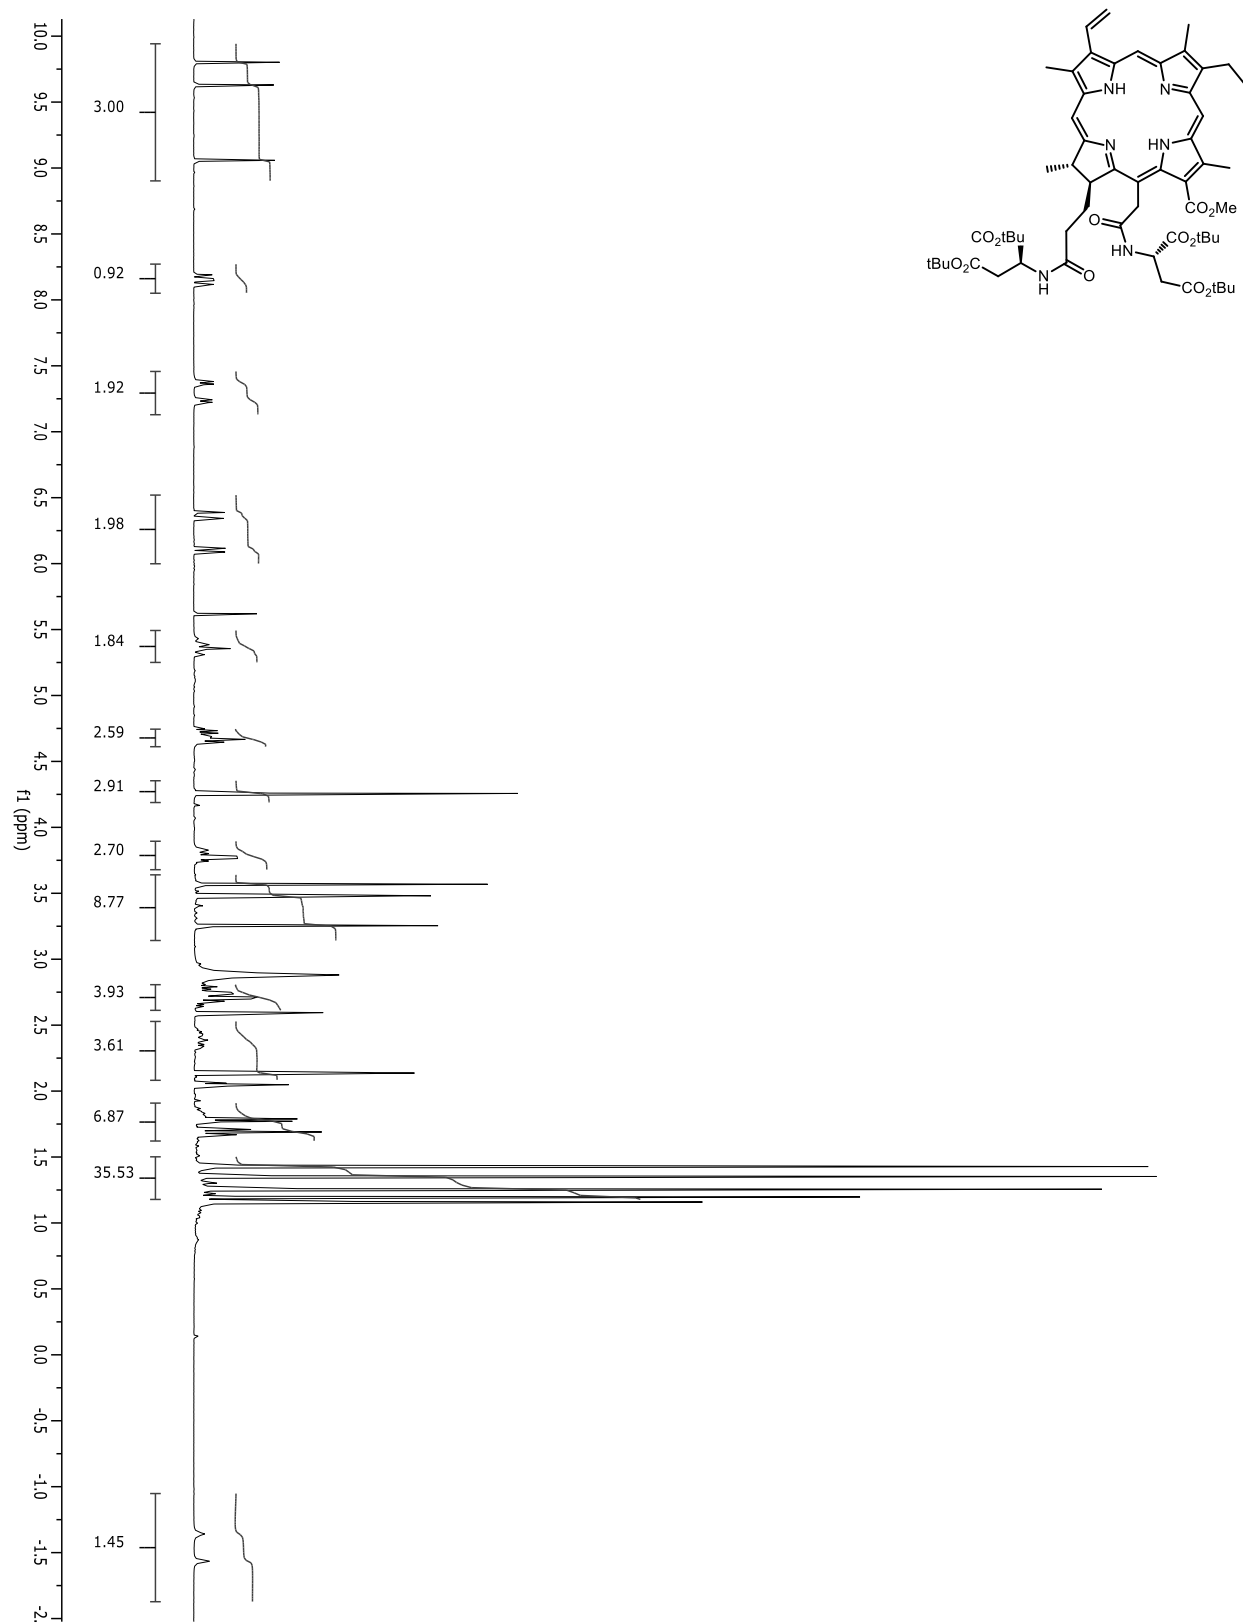

$^1\text{H}$  NMR spectrum of  $15^2,17^3$ -di(Asp)Ce<sub>6</sub> methyl ester (**12**) in acetone- $d_6$  at 400 MHz

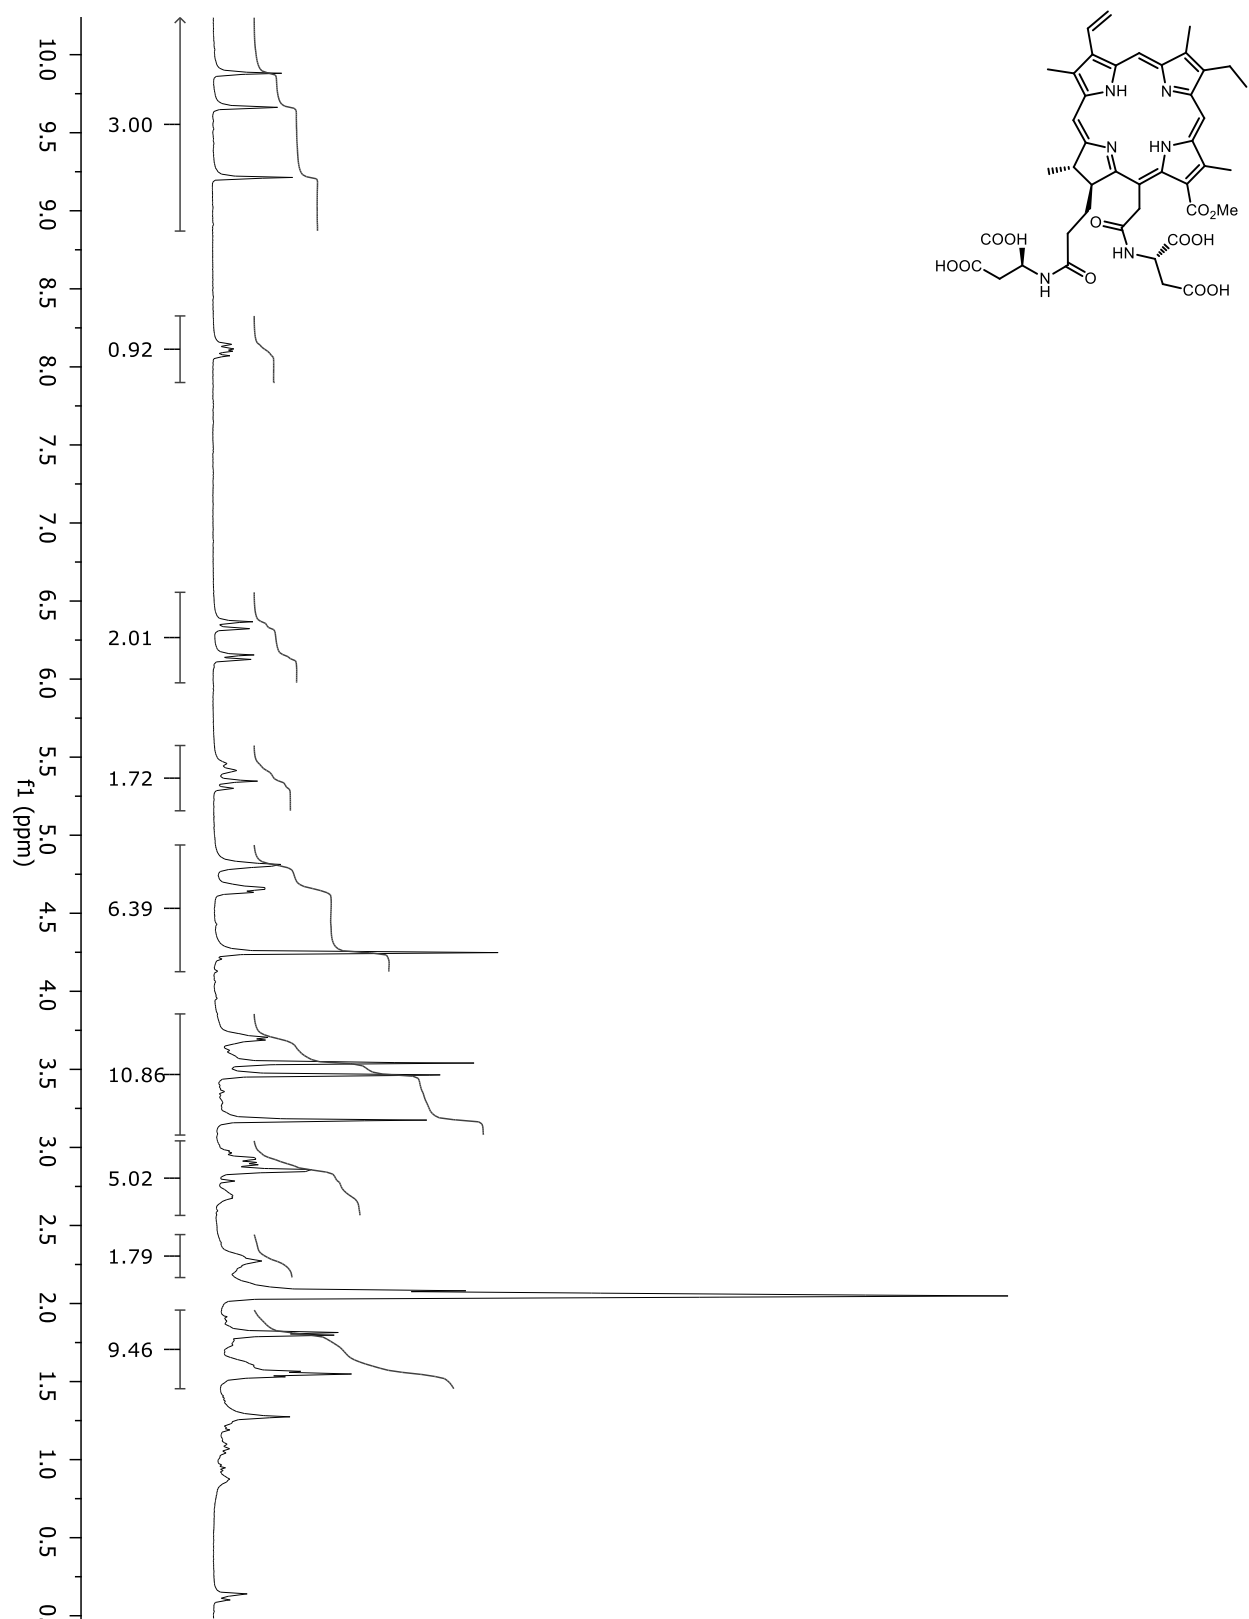

$^1\text{H}$  NMR spectrum of  $13^1,17^3$ -di(Asp) $\text{Ce}_6$  *tert*-butyl methyl ester (**20**) in acetone- $d_6$  at 400 MHz

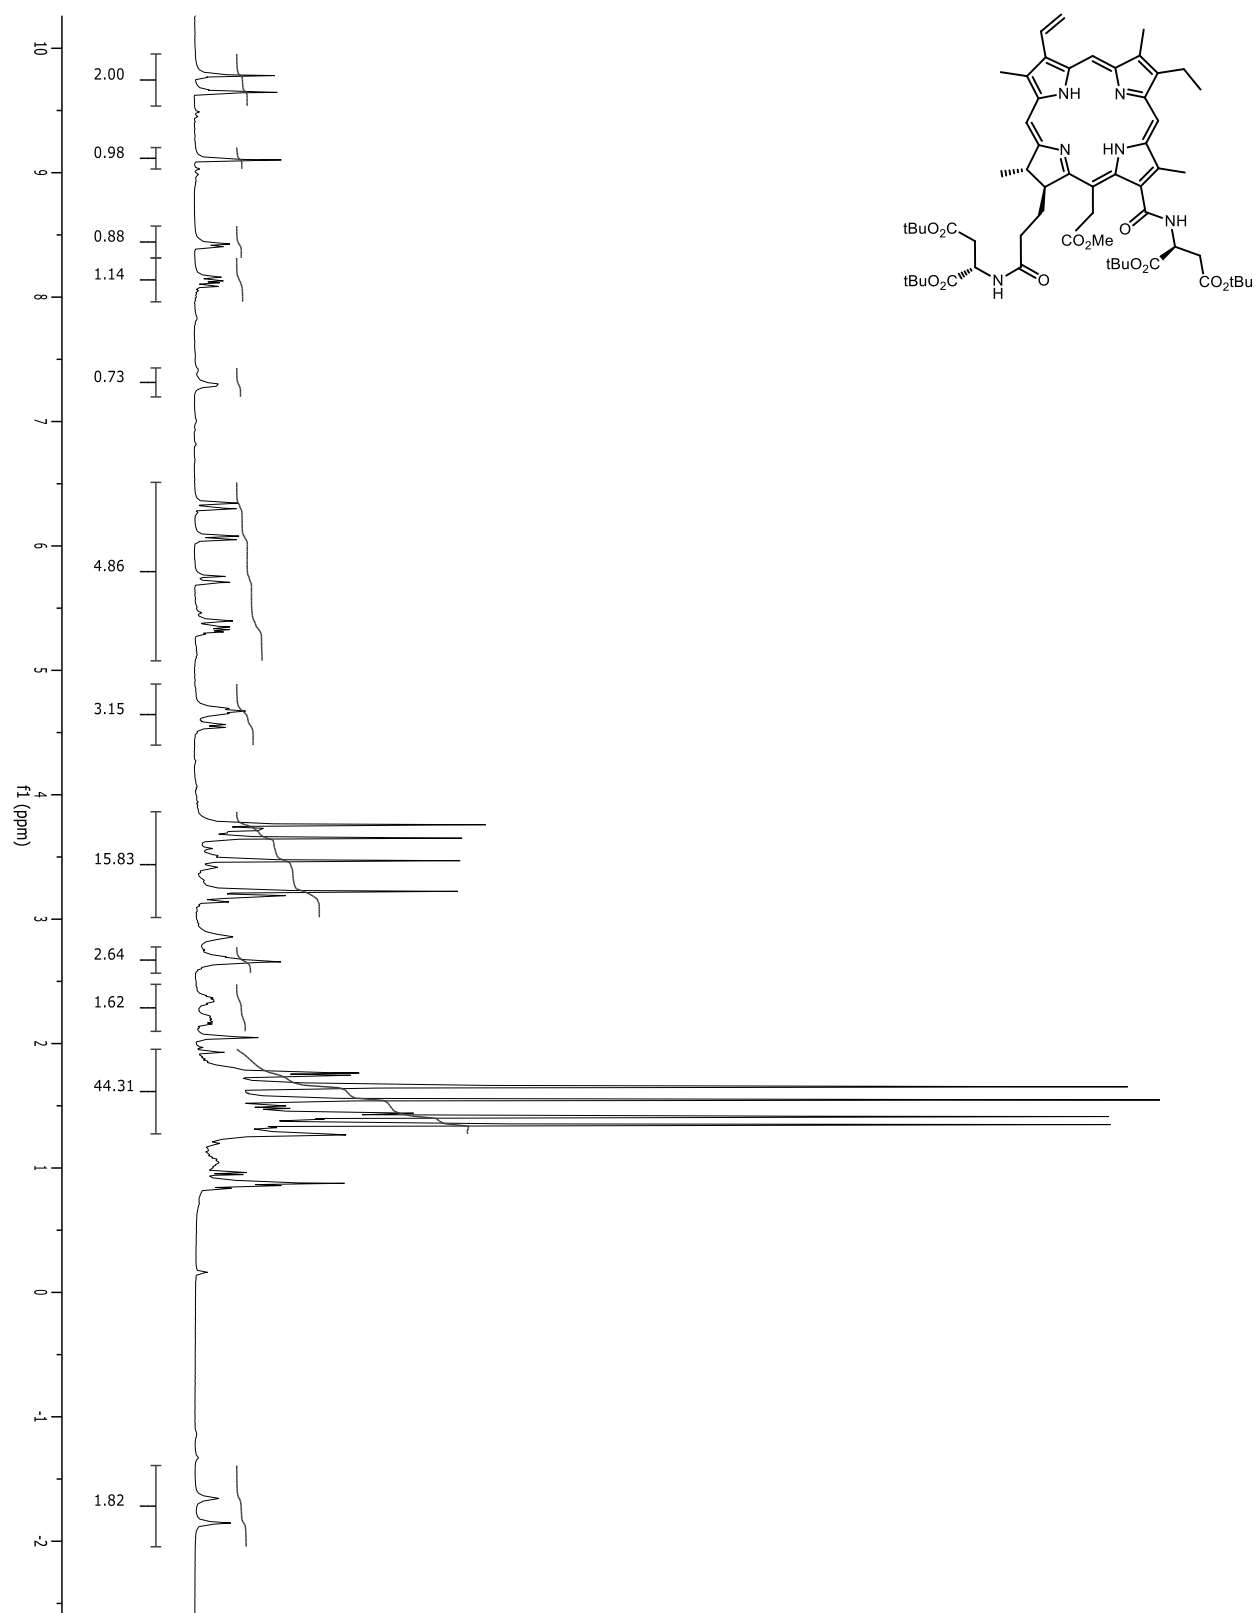

$^1\text{H}$  NMR spectrum of  $13^1,17^3$ -diaspartylchlorin  $e_6$  methyl ester (**13**) in MeOD at 400 MHz

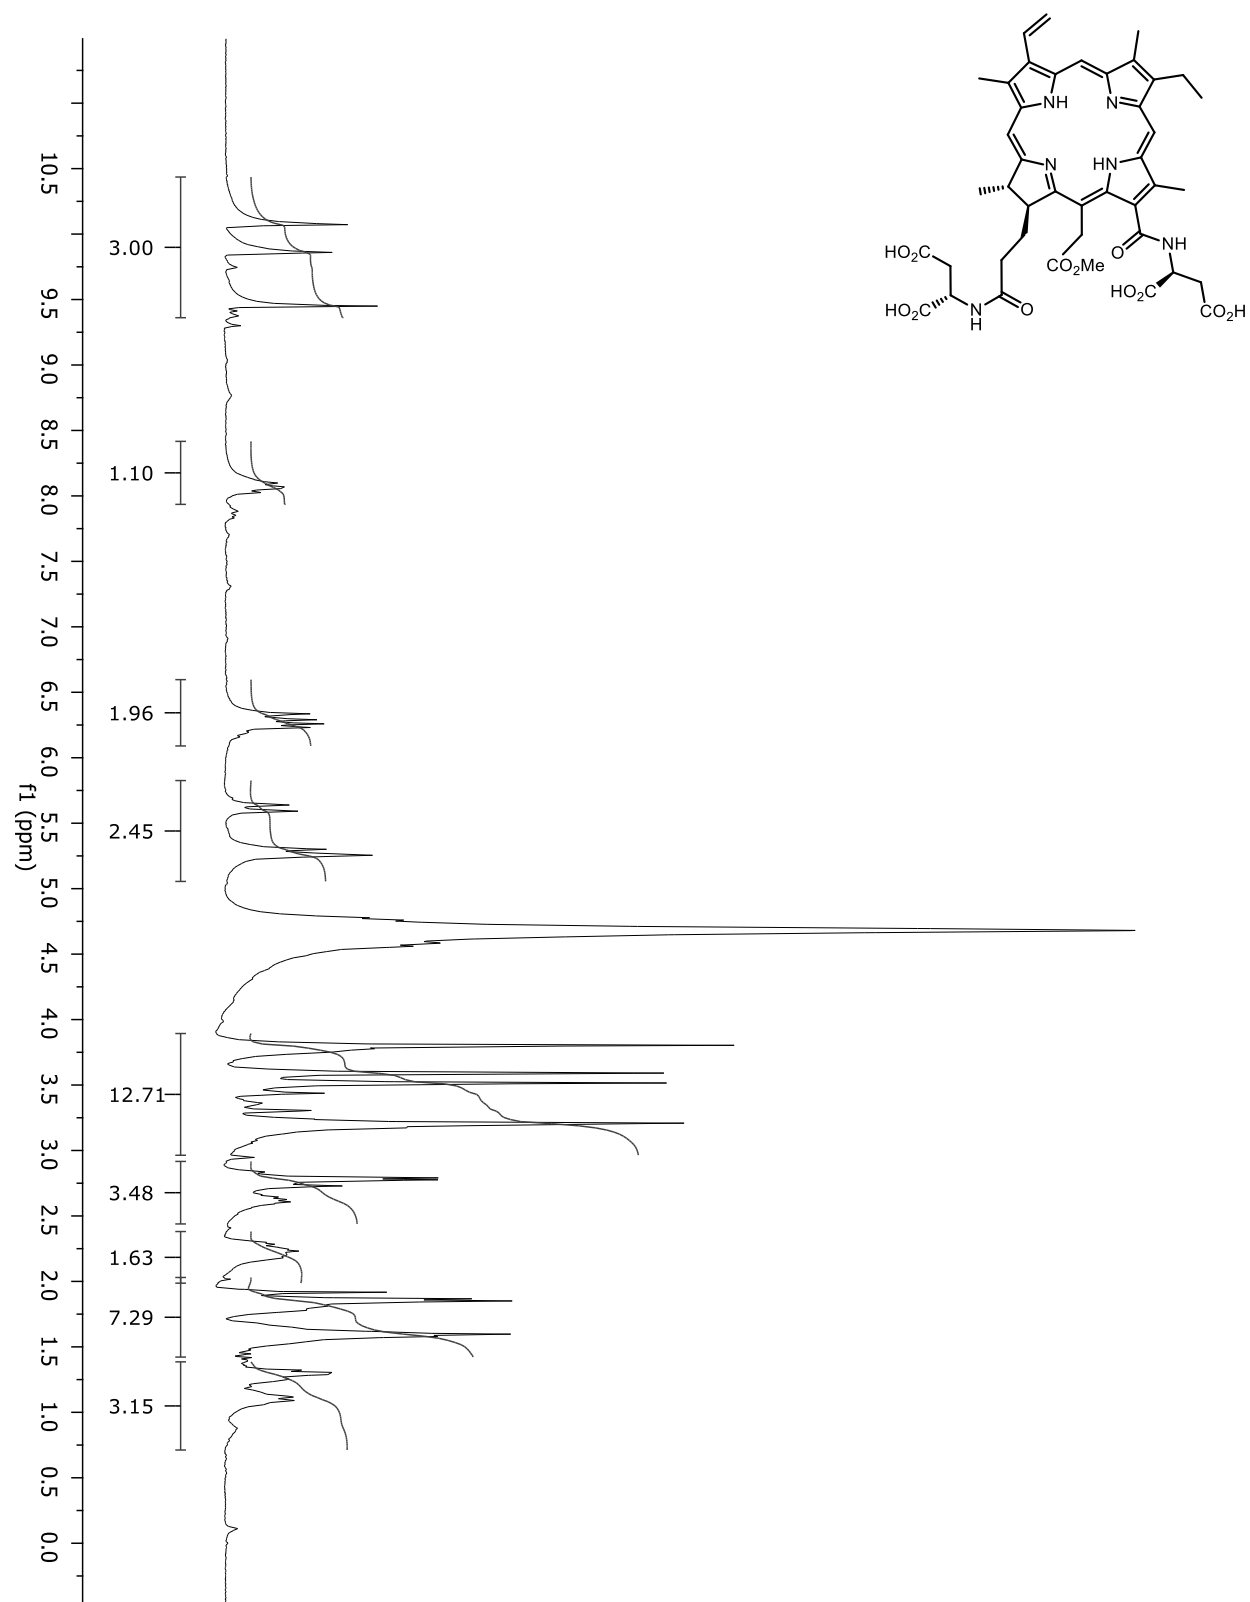

$^1\text{H}$  NMR spectrum of ethylenediaminyl(boc) pheophorbide a (**25**) in acetone- $d_6$  at 400 MHz

\* Contain 10% isocyclic ring opened product **24**

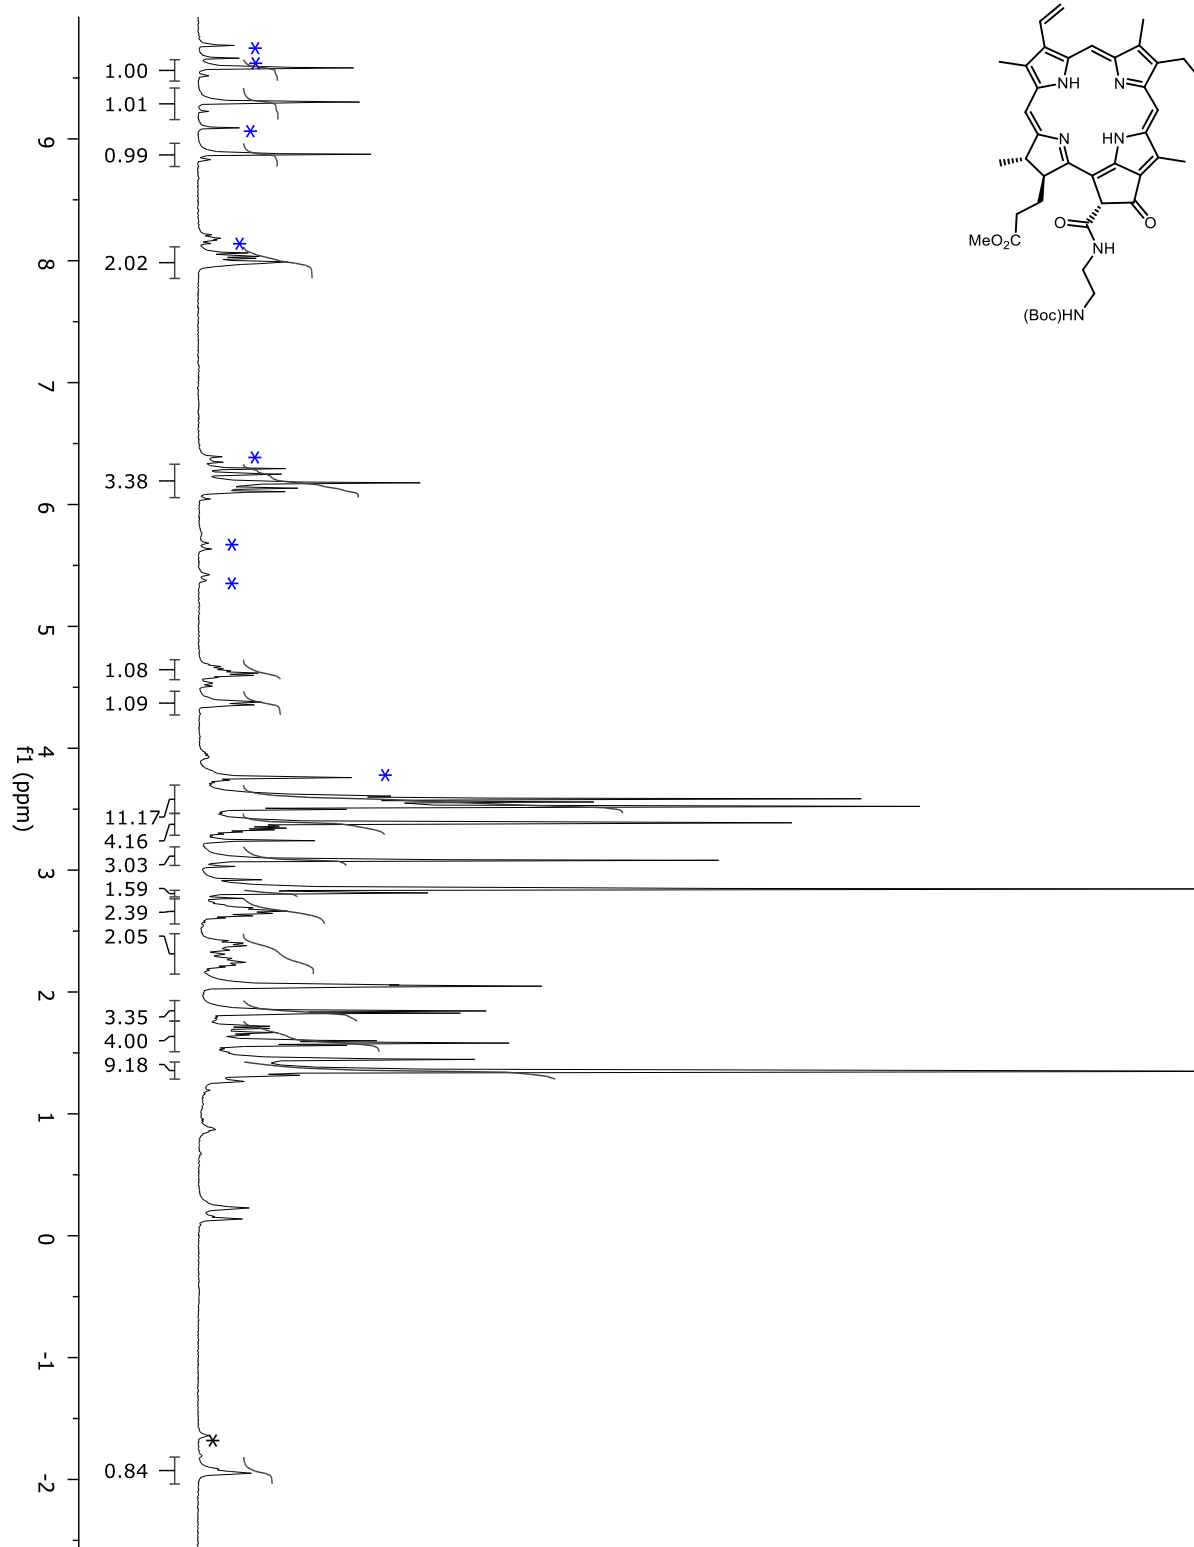

$^1\text{H}$  NMR spectrum of 13<sup>1</sup>-ED 15<sup>2</sup>-ED(boc)Ce<sub>6</sub> methyl ester (**26**) in acetone-*d*<sub>6</sub> at 400 MHz

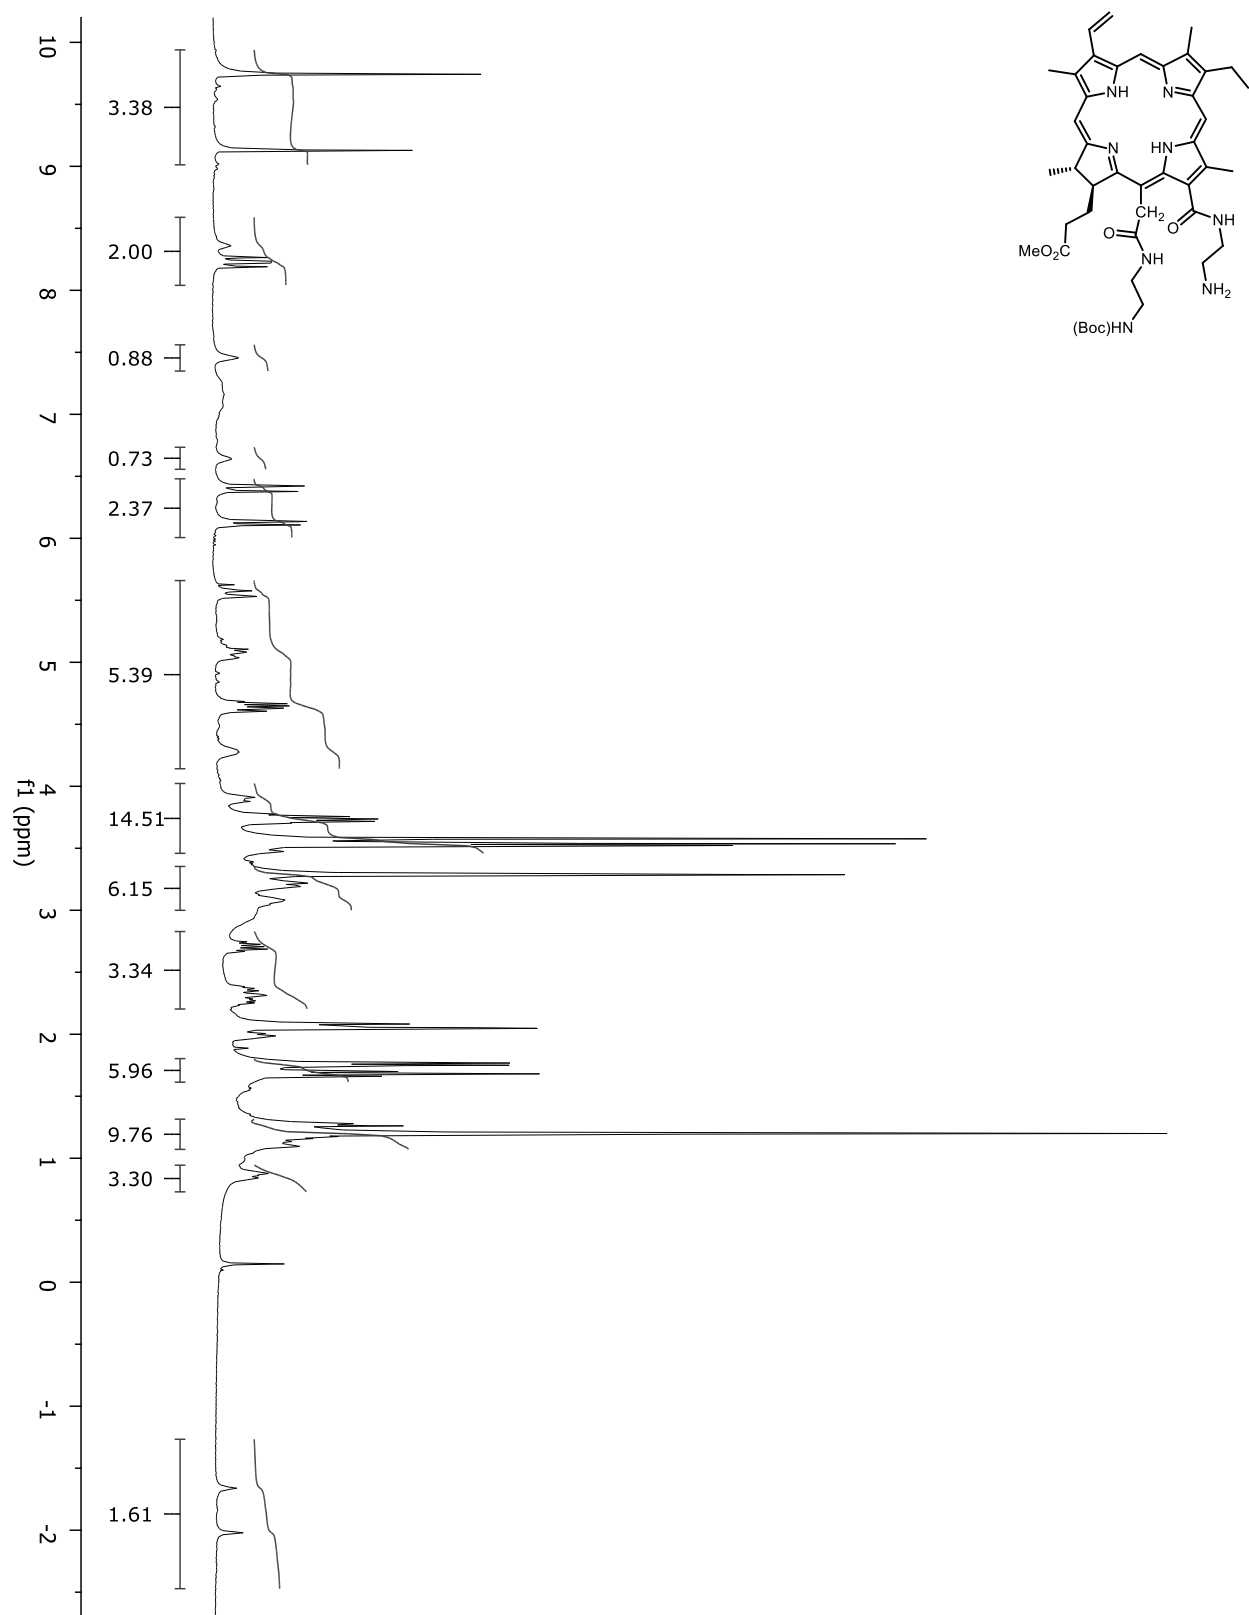



[illegible]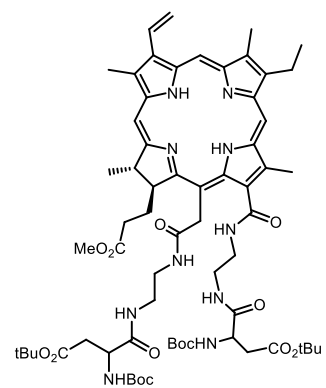

$^1\text{H}$  NMR spectrum of  $13^1,15^2$ -ED-AspCe<sub>6</sub> methyl ester (**29**) in methanol- $d_4$  at 400 MHz

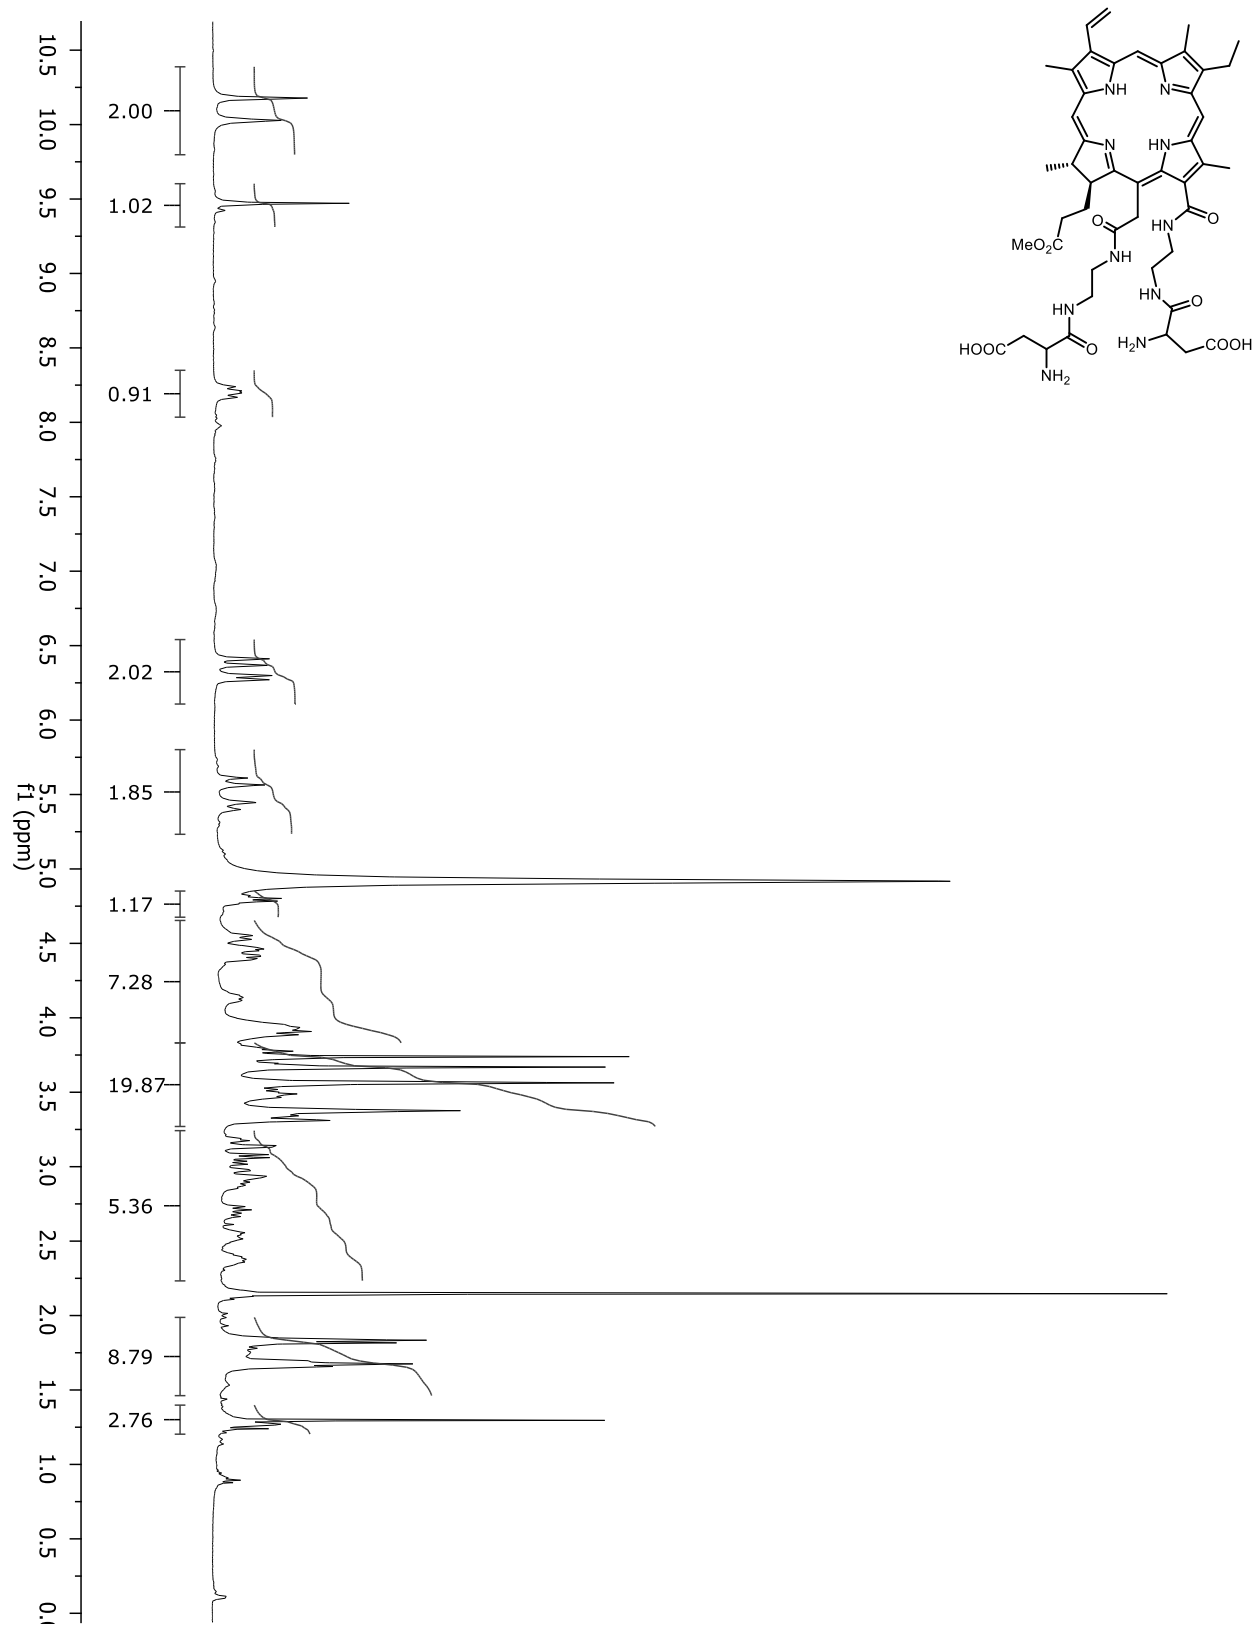

<sup>1</sup>H NMR spectrum of β-alanylpeoporbide *tert*-butyl methyl ester (**30**) in acetone-*d*<sub>6</sub> at 400 MHz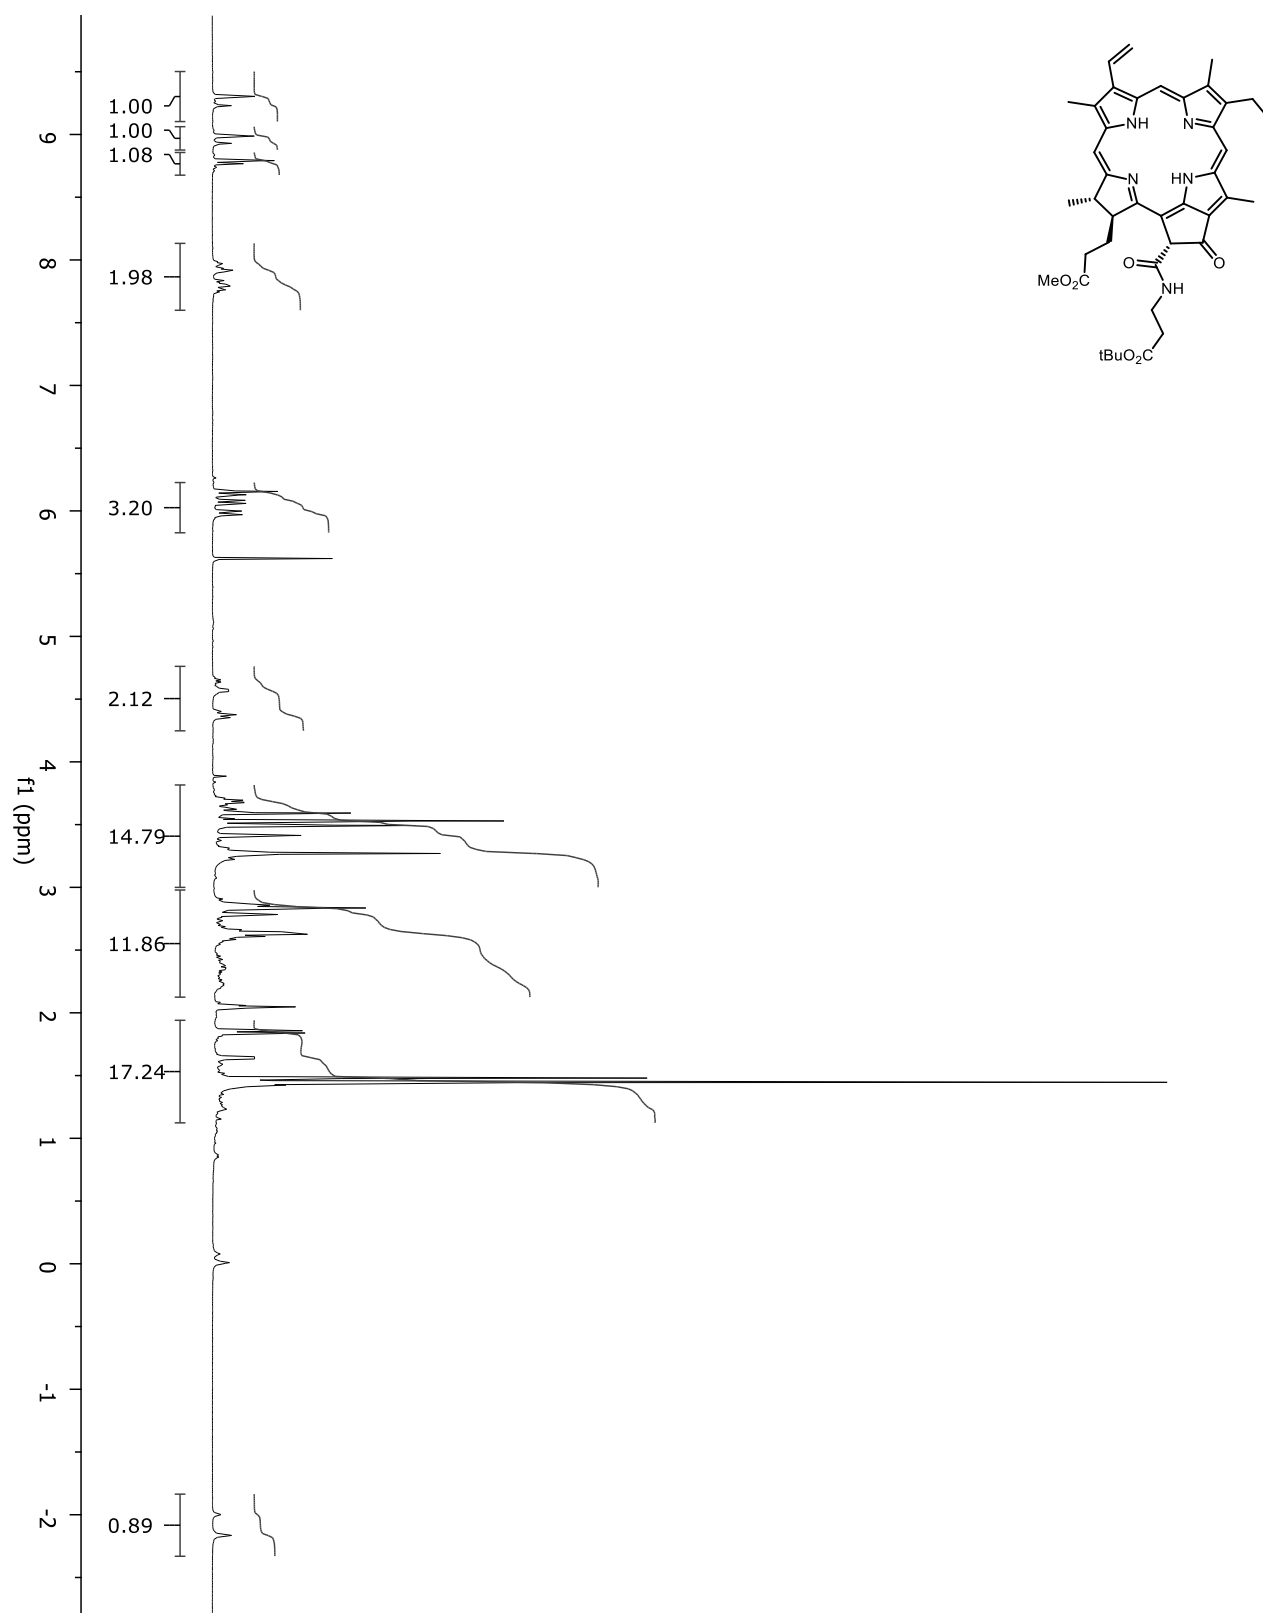

<sup>1</sup>H NMR spectrum of β-alanylasparylpeoporbide di-*tert*butyl methyl ester **32** in acetone-*d*<sub>6</sub> at 400 MHz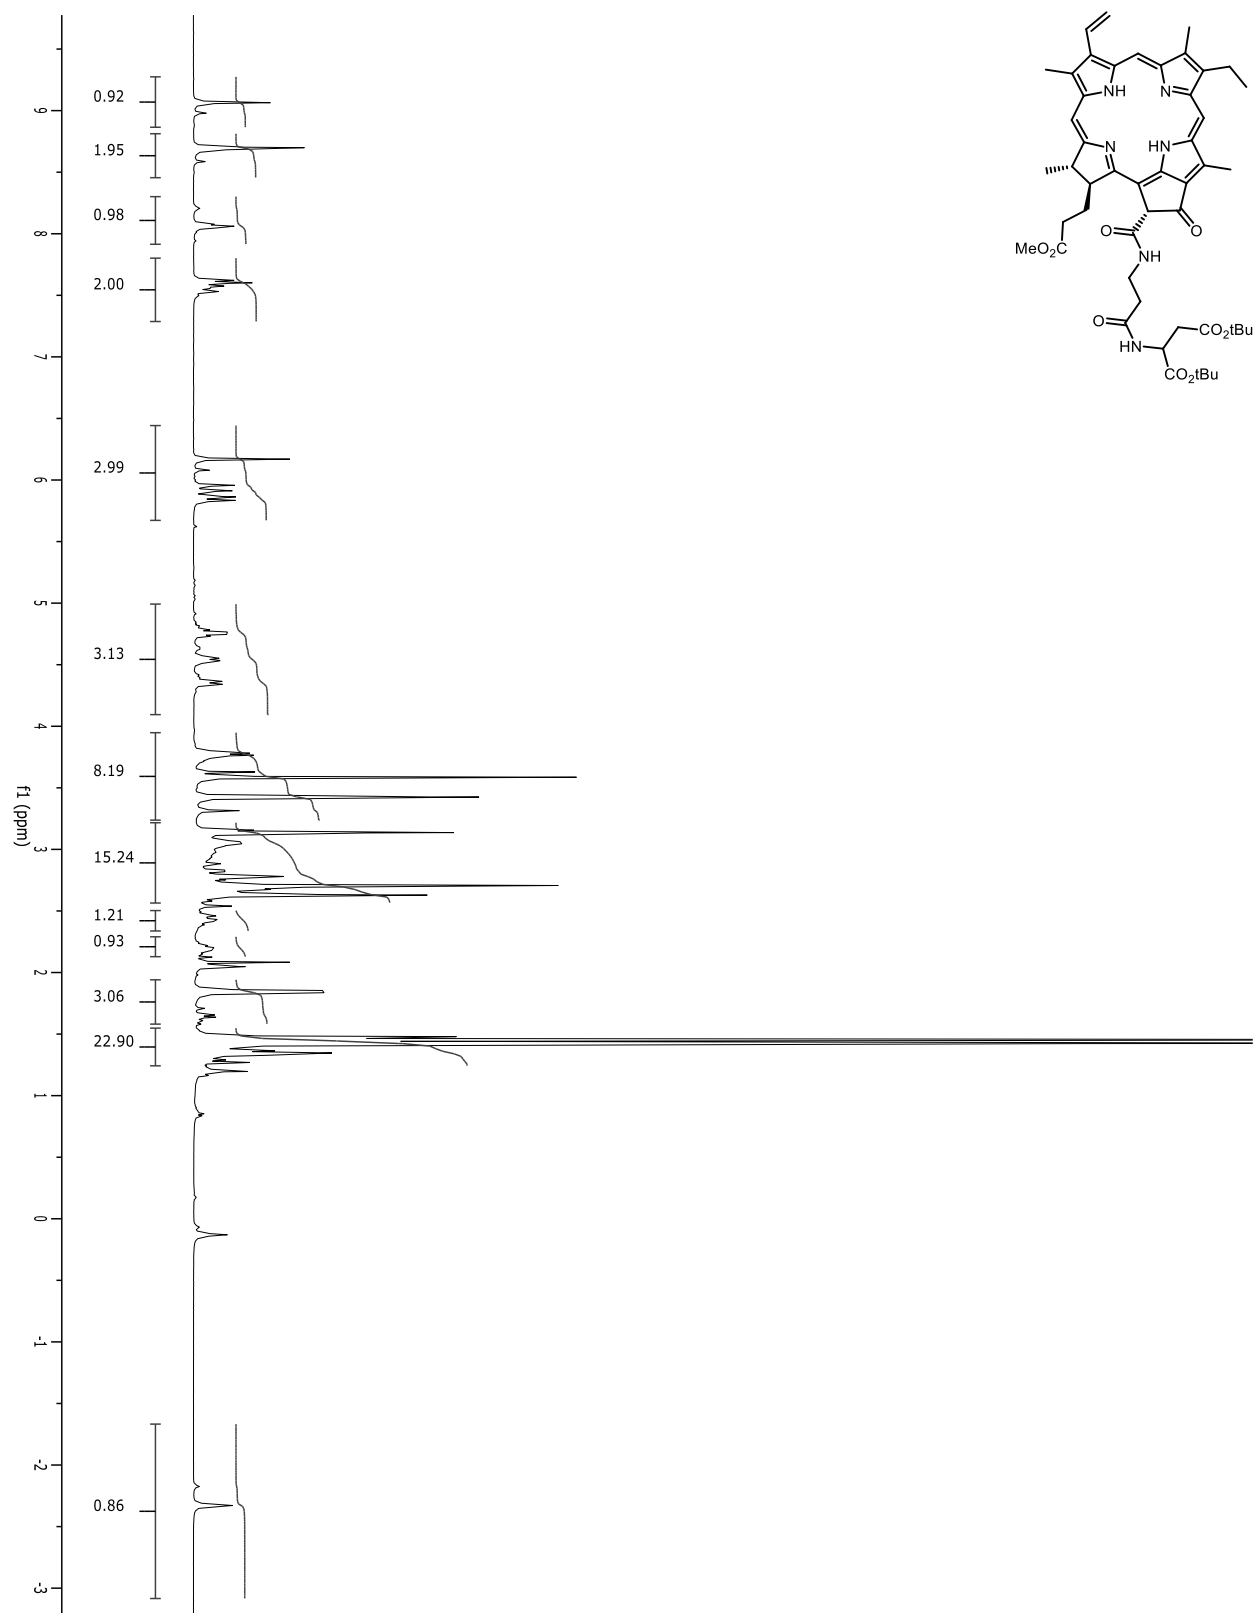

$^1\text{H}$  NMR spectrum of  $13^2\text{-EDLys-15}^2\text{-}\beta\text{-AlaAspCe}_6$  *tert*-butyl boc methyl ester in acetone- $d_6$  at 400 MHz

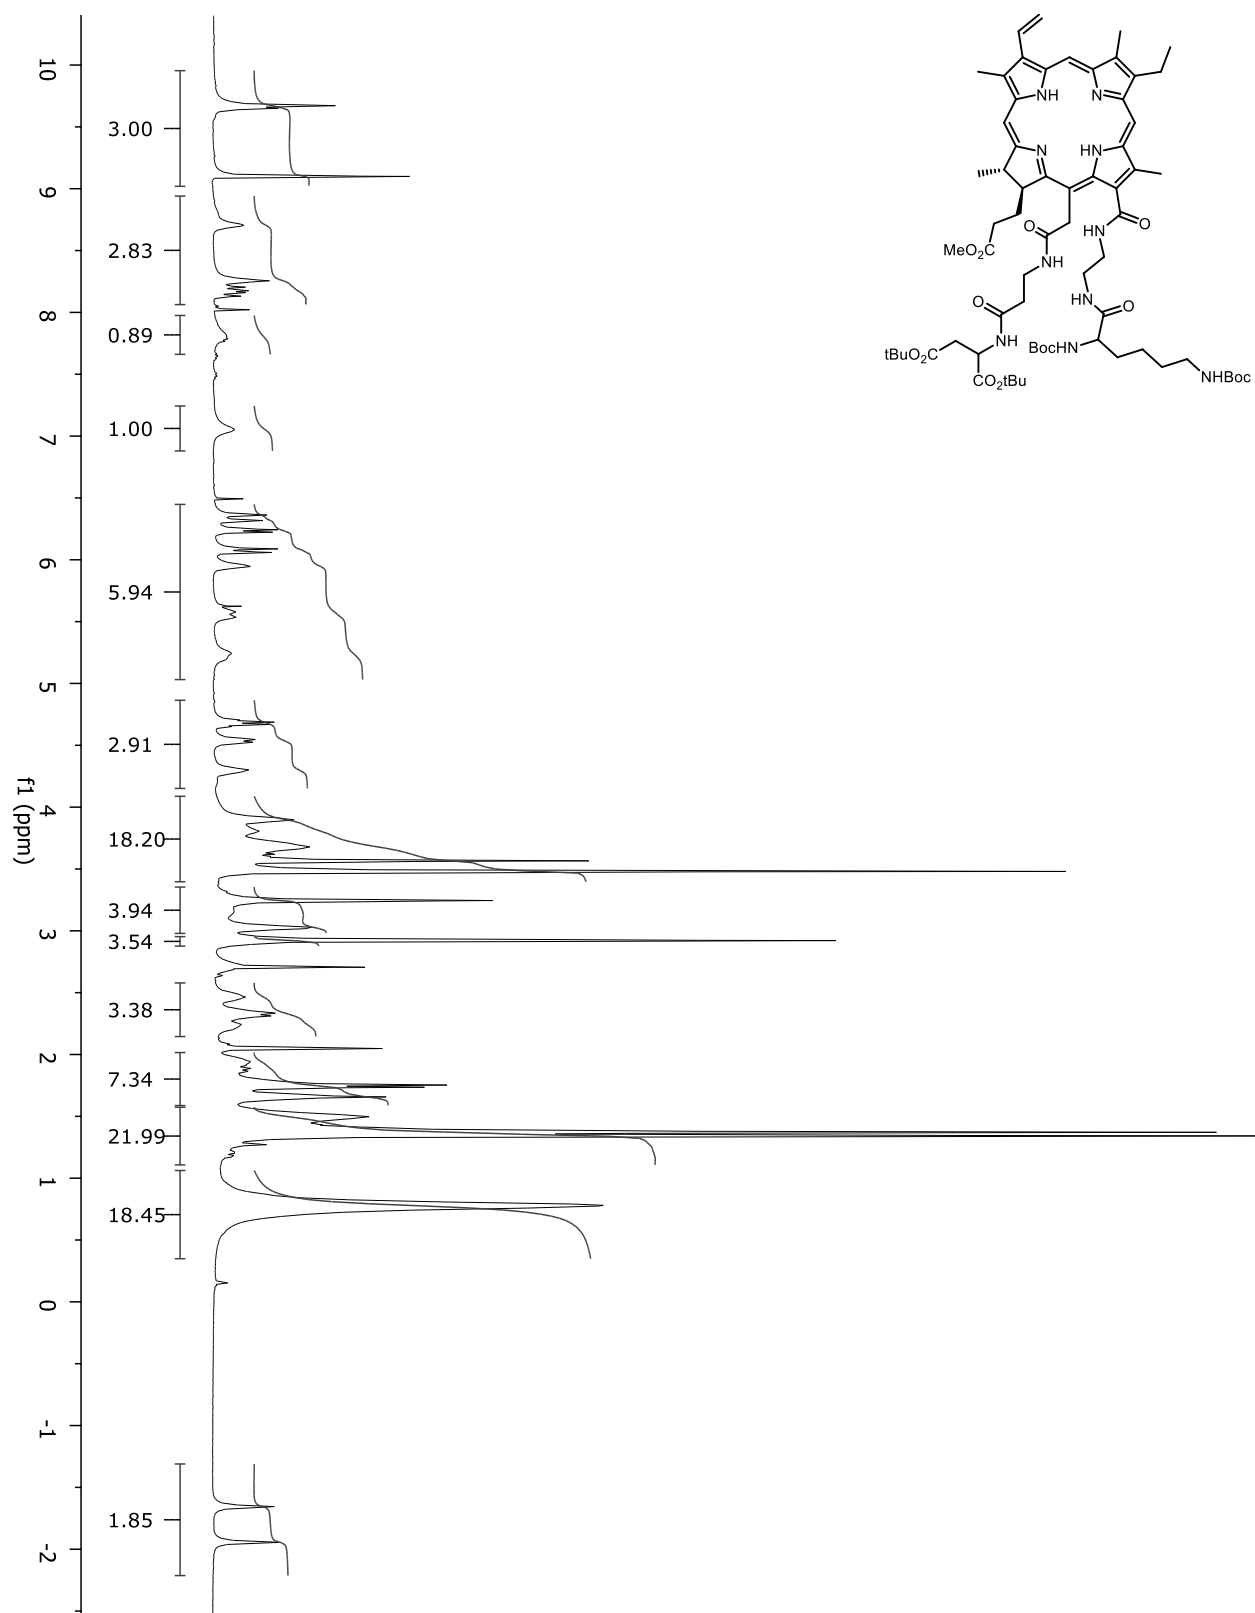

$^1\text{H}$  NMR spectrum of  $13^2\text{-EDLys-15}^2\text{-}\beta\text{-AlaAspCe}_6$  methyl ester (**34**) in acetone- $d_6$  at 400 MHz

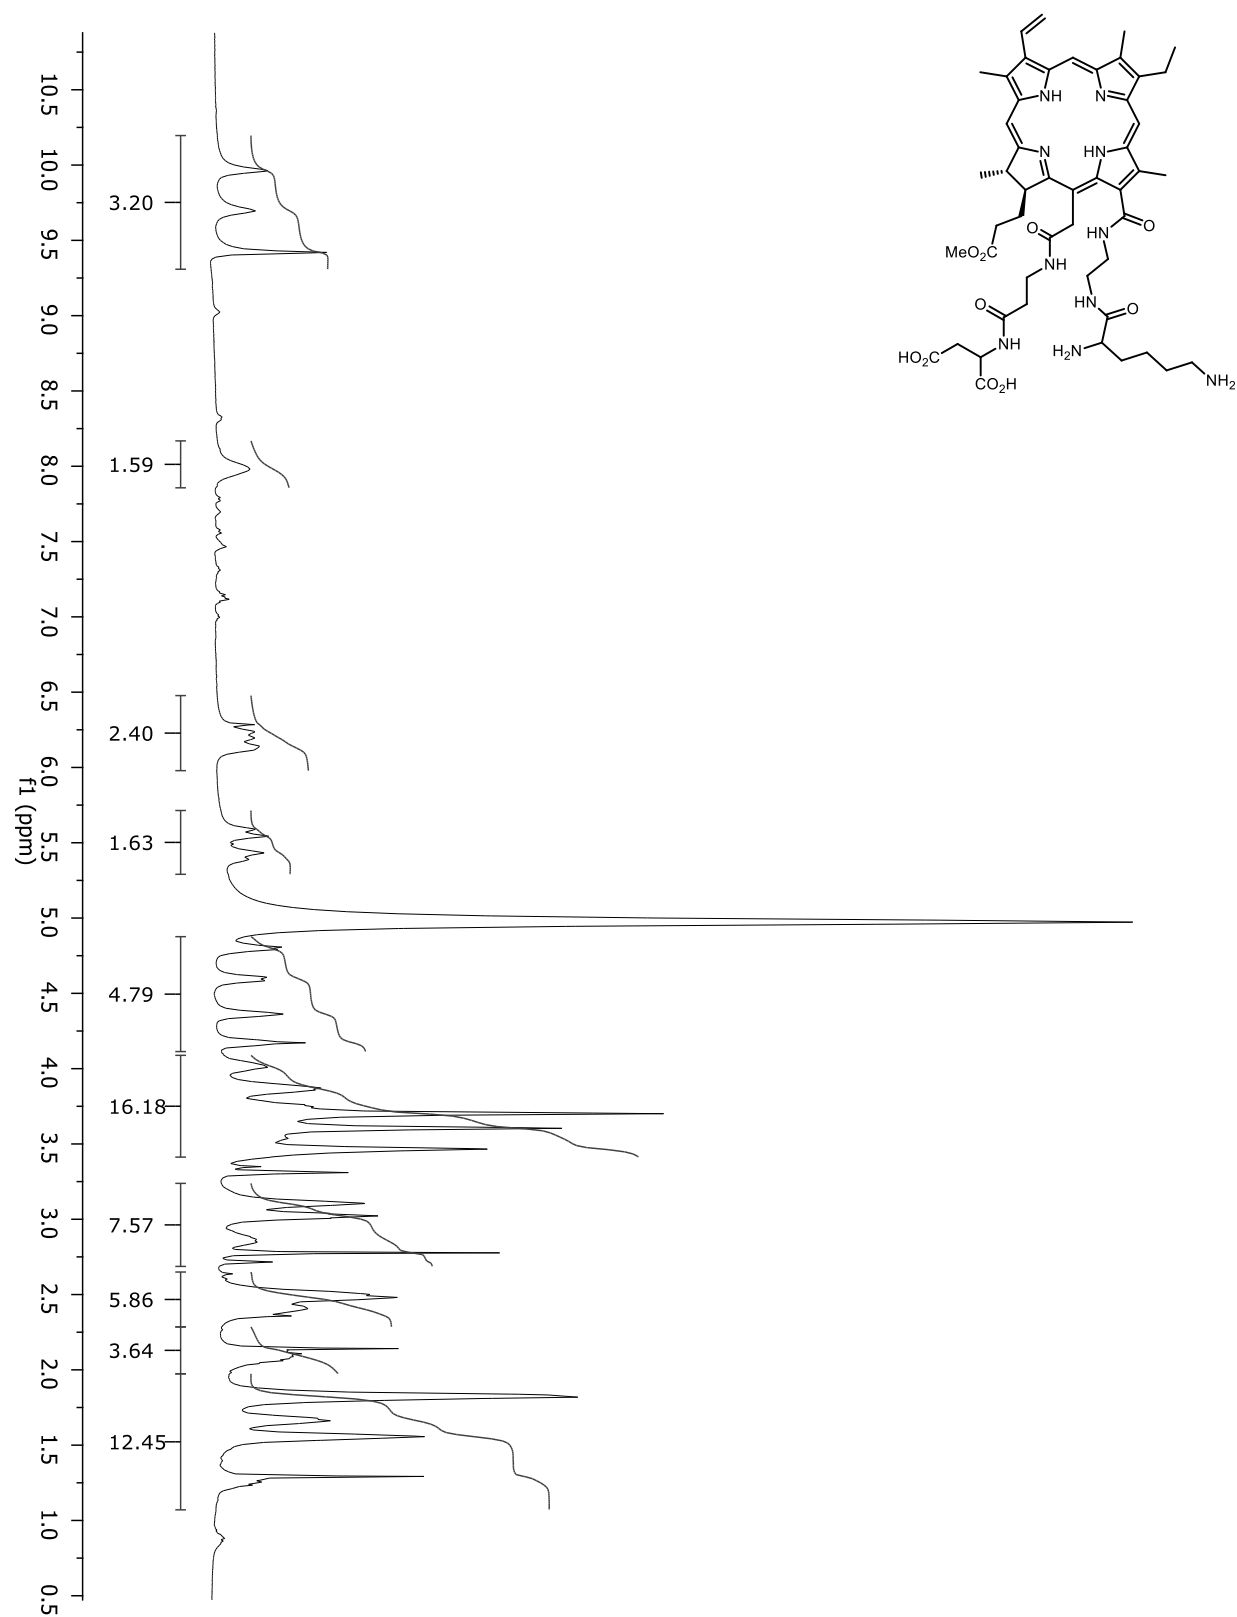

$^1\text{H}$  NMR spectrum of  $13^1,17^3$ -diaspartylchlorin  $e_6$  methyl ester (**13**) in MeOD at 400 MHz

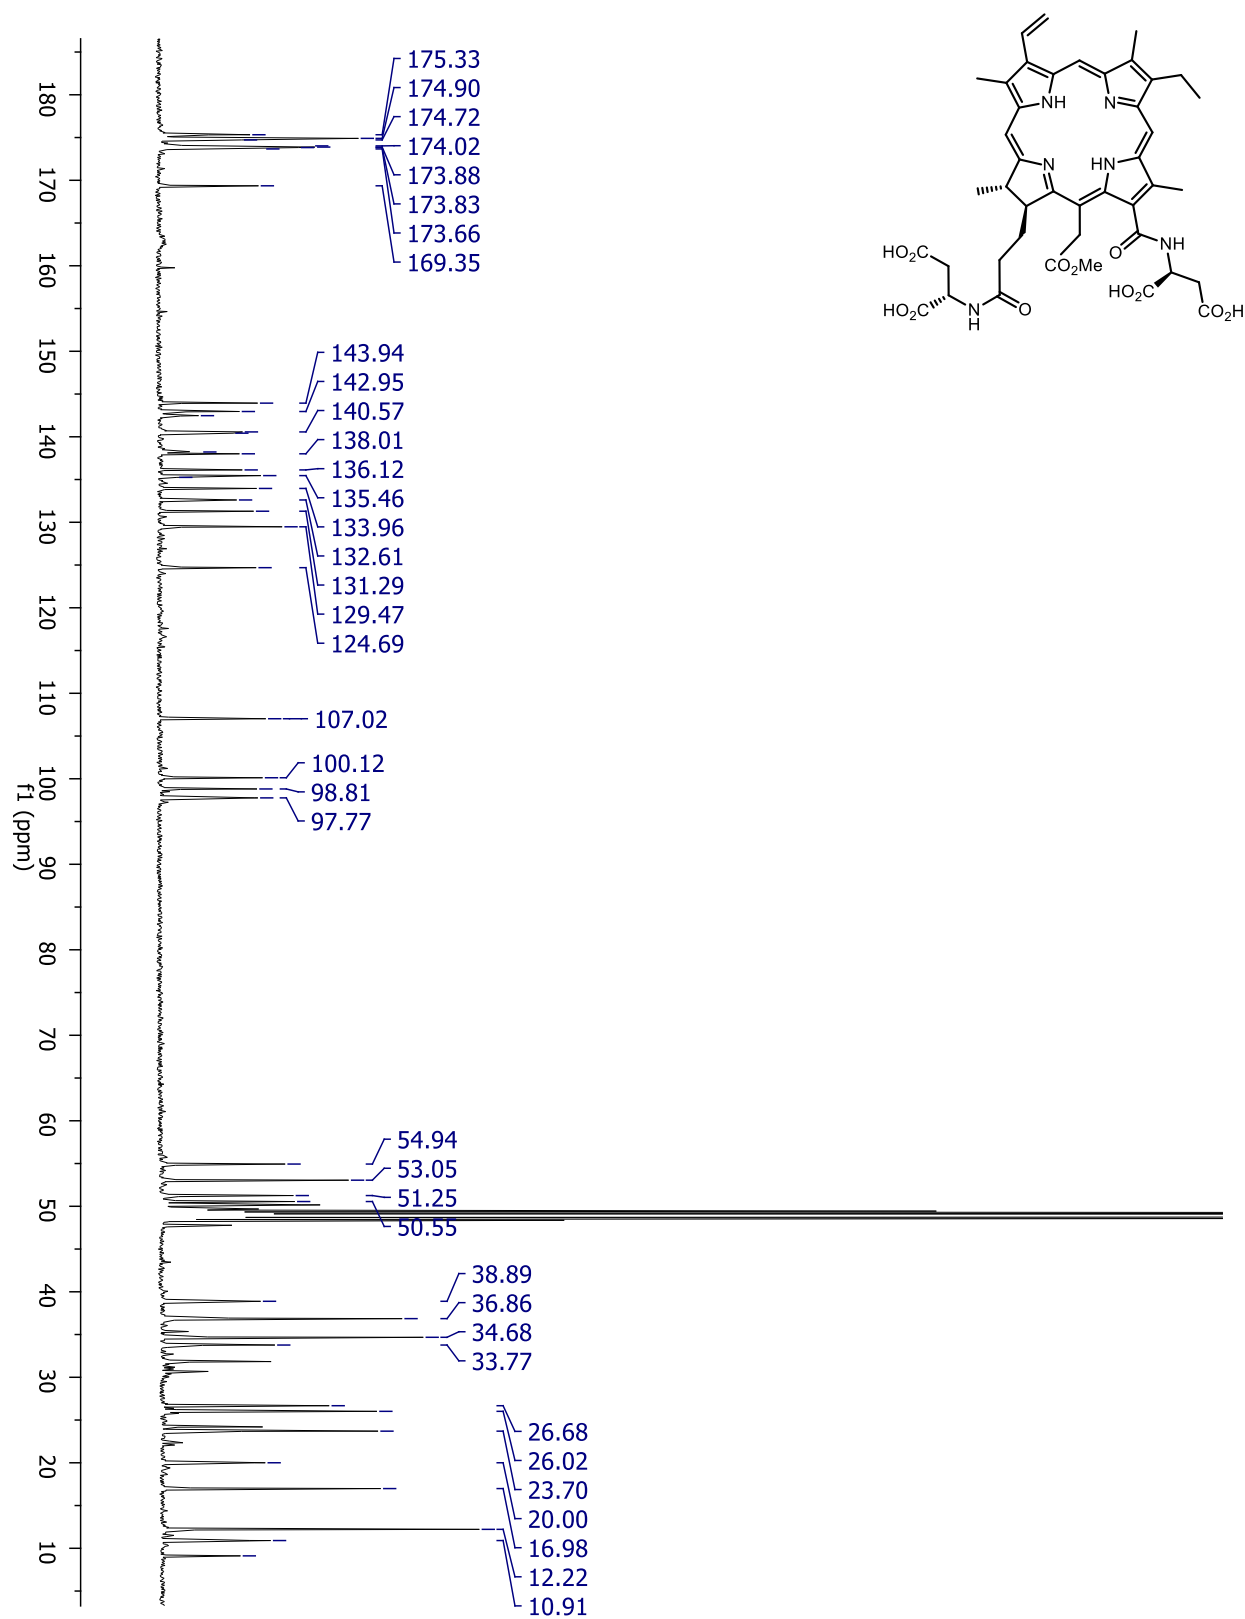

$^{13}\text{C}$  NMR spectrum of  $^{13}\text{C}_1,^{15}\text{N}_2$ -ED-AspCe<sub>6</sub> methyl ester (**29**) in methanol-*d*<sub>4</sub> at 400 MHz

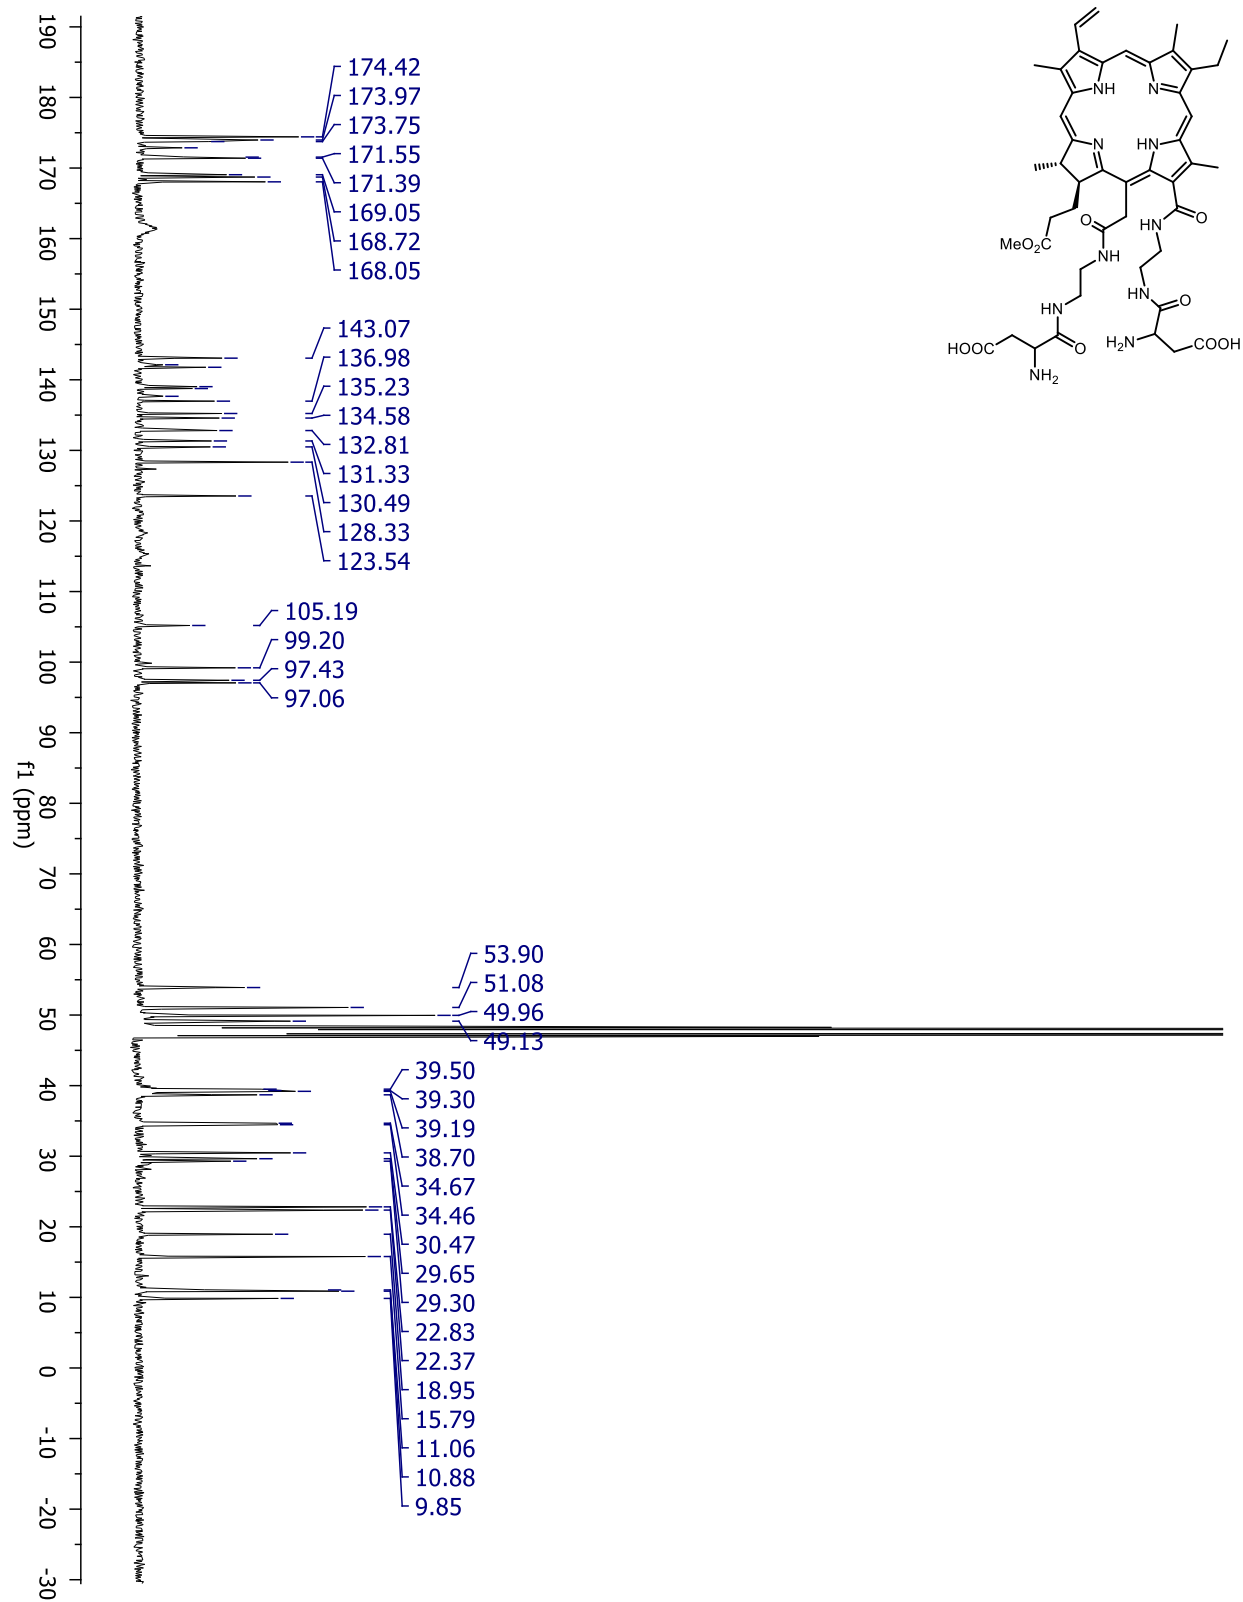



$^{13}\text{C}$  NMR spectrum of  $15^2,17^3$ -di(Asp)Ce<sub>6</sub> methyl ester (**12**) in methanol-*d*<sub>4</sub> at 100 MHz

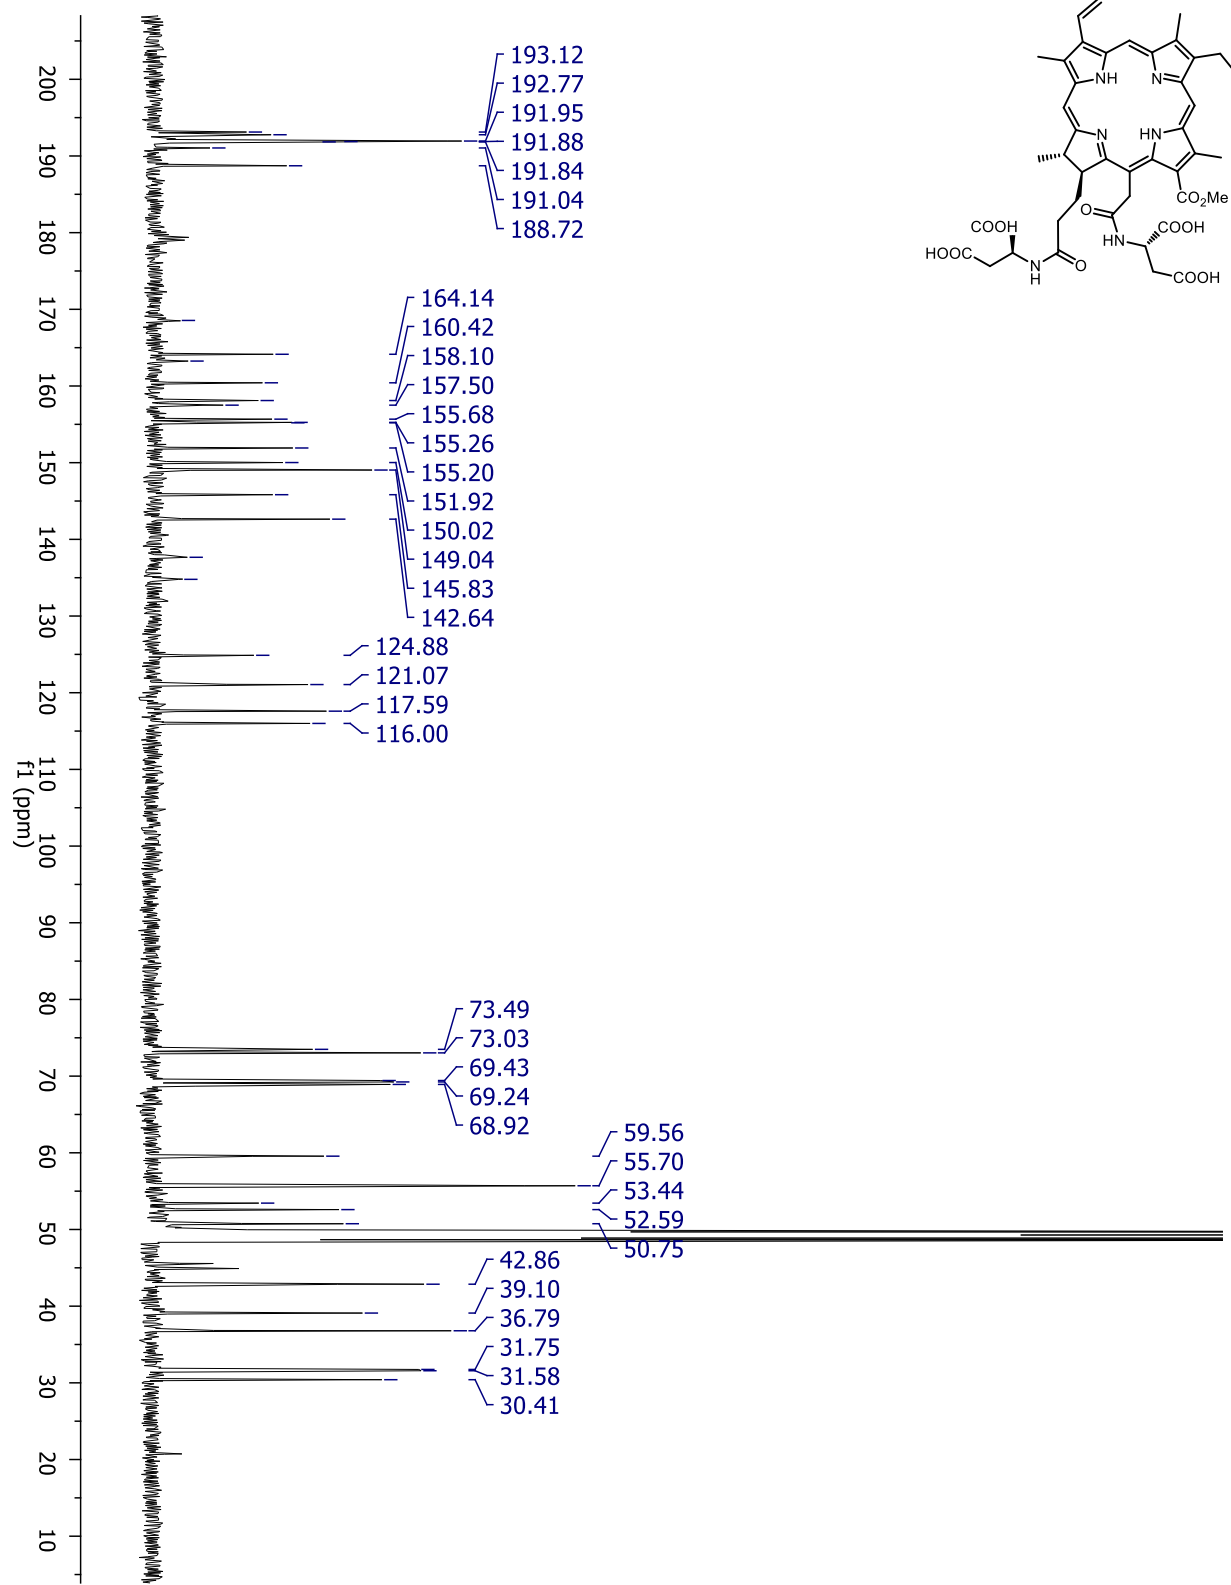

$^{13}\text{C}$  NMR spectrum of  $^{13}\text{C}$ -EDLys- $^{15}\text{N}$ - $\beta$ -AlaAspCe<sub>6</sub> methyl ester (**34**) in methanol-*d*<sub>4</sub> at 100 MHz

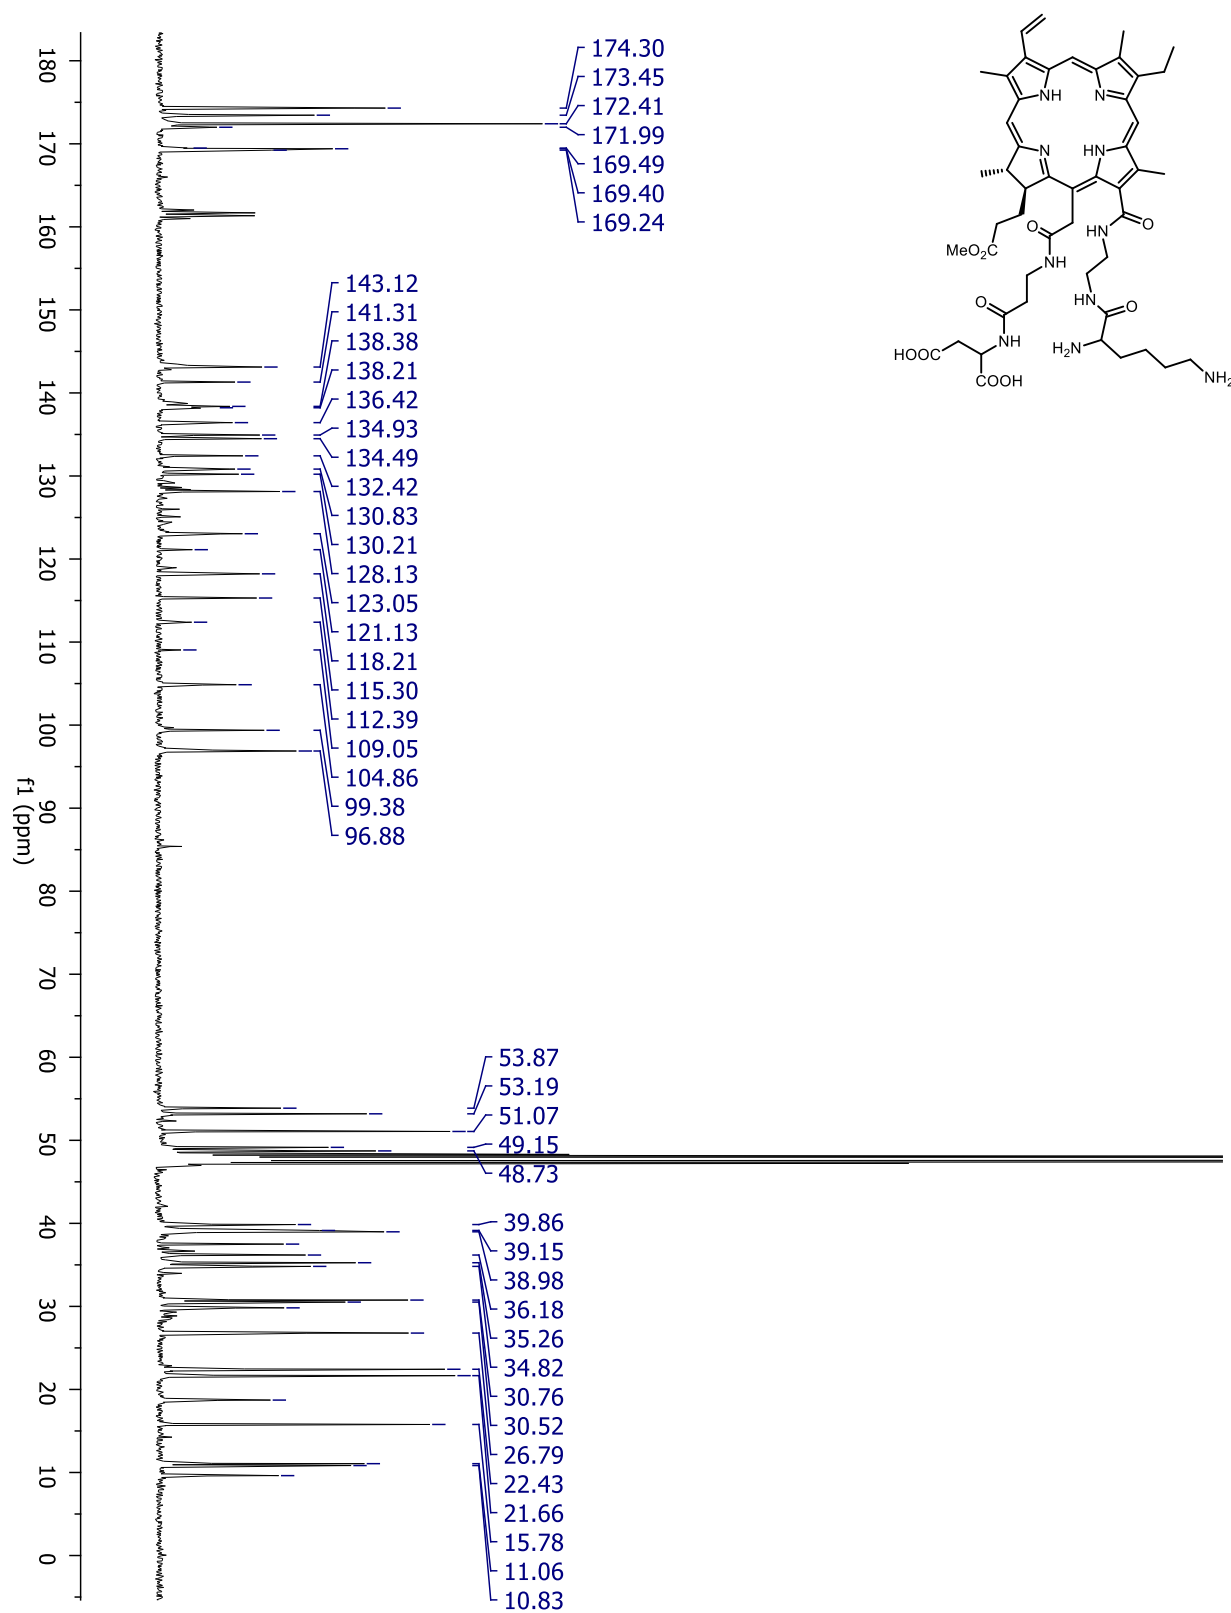

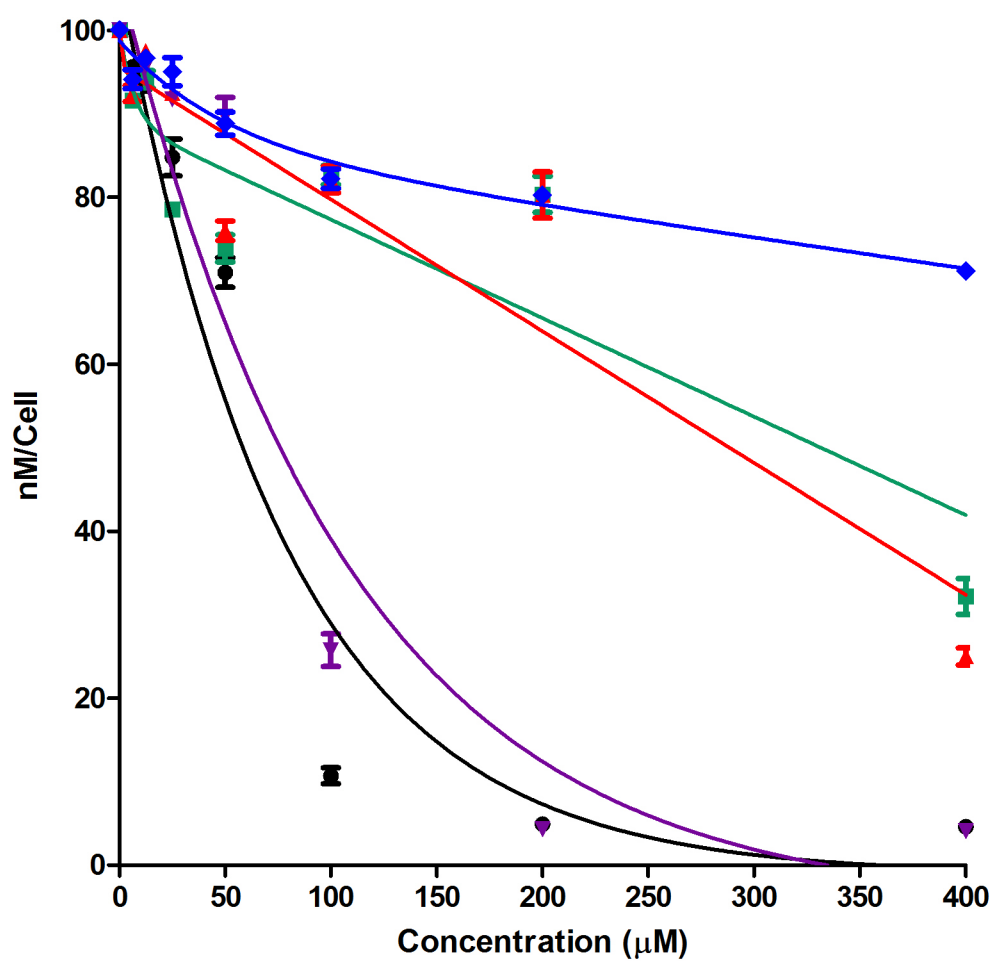

Dark toxicity of chlorin e<sub>6</sub> (**1**, green) and its derivatives 15<sup>2</sup>,17<sup>3</sup>-di(Asp)Ce<sub>6</sub> MME (**12**, blue), 13<sup>1</sup>,17<sup>3</sup>-di(Asp)Ce<sub>6</sub> MME (**13**, red), 13<sup>1</sup>,15<sup>2</sup>-di(EDAsp)Ce<sub>6</sub> MME (**28**, purple) and 13<sup>1</sup>-EDLys-15<sup>2</sup>-β-AlaAspCe<sub>6</sub> MME (**33**, black), toward HEp2 cells using the Cell Titer Blue assay.

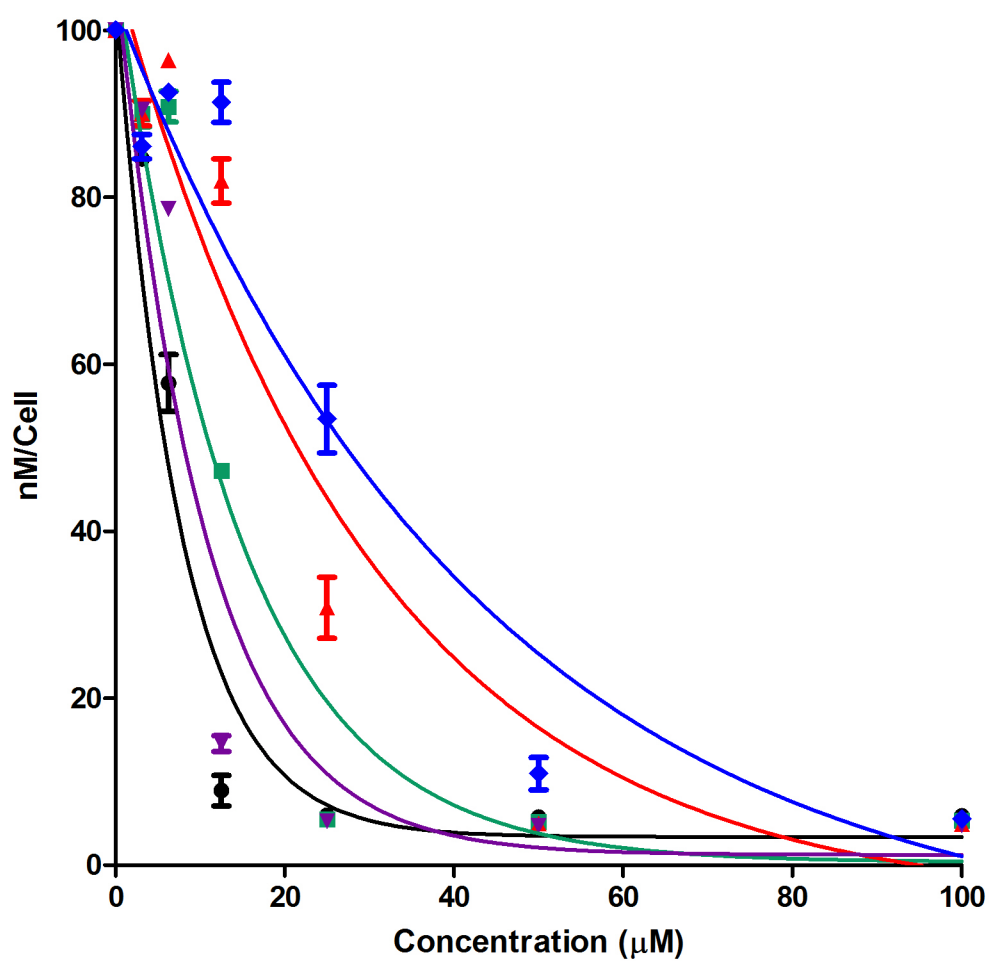

Phototoxicity of chlorin e<sub>6</sub> (**1**, green) and its derivatives 15<sup>2</sup>,17<sup>3</sup>-di(Asp)Ce<sub>6</sub> MME (**12**, blue), 13<sup>1</sup>,17<sup>3</sup>-di(Asp)Ce<sub>6</sub> MME (**13**, red), 13<sup>1</sup>,15<sup>2</sup>-di(EDAsp)Ce<sub>6</sub> MME (**28**, purple) and 13<sup>1</sup>-EDLys-15<sup>2</sup>-β-AlaAspCe<sub>6</sub> MME (**33**, black), toward HEp2 cells using 1J/cm<sup>2</sup> light dose and the Cell Titer Blue assay.

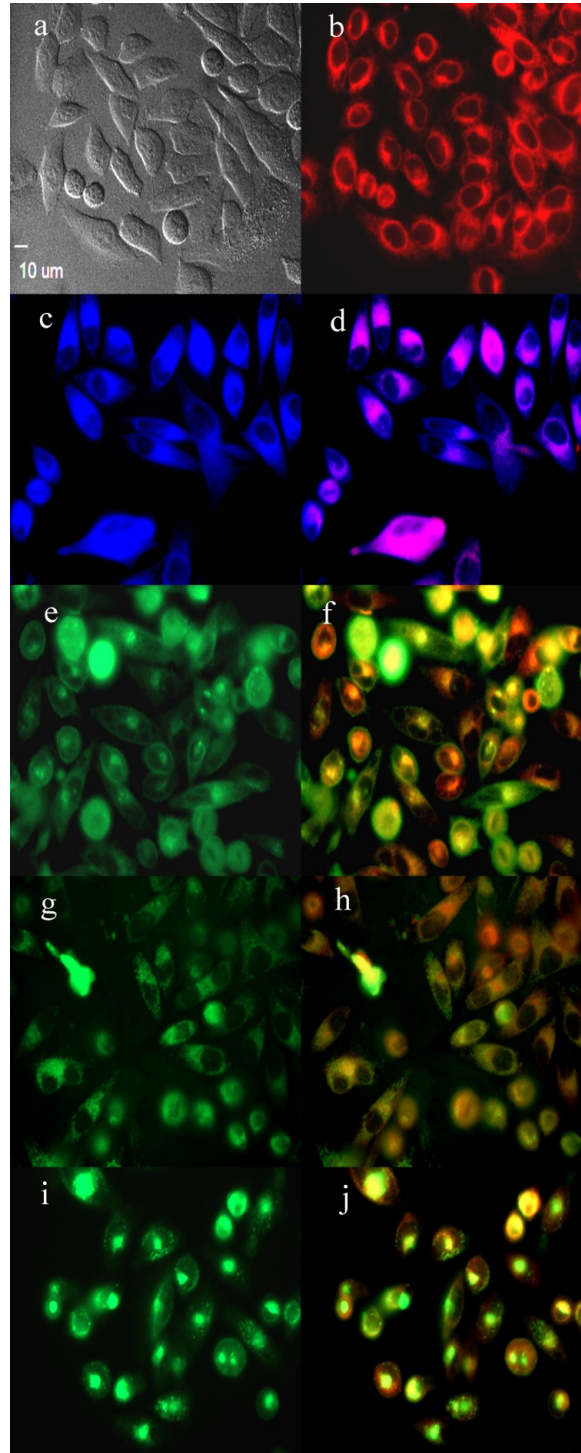

Subcellular localization of chlorin  $e_6$  in HEp2 cells at 10  $\mu$ M for 6h, (a) phase contrast, (b) overlay of chlorin  $e_6$  and phase contrast, (c) ER Tracker Blue, (d) overlay of chlorin  $e_6$  and ER Tracker Blue, (e) BODIPY Ceramide, (f) overlay of chlorin  $e_6$  and BODIPY Ceramide, (g) MitoTracker Green, (h) overlay of chlorin  $e_6$  and MitoTracker Green, (i) LysoSensor Green, (j) overlay of chlorin  $e_6$  and LysoSensor Green. Scale bar: 10  $\mu$ m
